# Supplementary material for: A Compact, Low-Cost and Low-Power Turbidity Sensor for Continuous In-Situ Stormwater Monitoring
Source: Preprints.org preprint supplement (doi:10.20944/preprints202404.1338.v1), 2024-04-23
Supplement: Supplementary file 1 [file supplementary]

## Sheet: Tabelle1
Melbourne time	UTC	No.	Volts	Turbidity(NTU)
2020-05-29 11:48:00	2020-05-29 01:48:00	0	12.9319	15.1568
2020-05-29 11:54:00	2020-05-29 01:54:00	1	12.9267	15.5763
2020-05-29 12:00:00	2020-05-29 02:00:00	2	12.9272	15.3545
2020-05-29 12:06:00	2020-05-29 02:06:00	3	12.9276	16.1512
2020-05-29 12:12:00	2020-05-29 02:12:00	4	12.9245	15.1278
2020-05-29 12:18:00	2020-05-29 02:18:00	5	12.9262	15.0263
2020-05-29 12:24:00	2020-05-29 02:24:00	6	12.9276	15.7933
2020-05-29 12:30:00	2020-05-29 02:30:00	7	12.9288	15.4581
2020-05-29 12:36:00	2020-05-29 02:36:00	8	12.9312	16.8144
2020-05-29 12:42:00	2020-05-29 02:42:00	9	12.9289	15.6512
2020-05-29 12:48:00	2020-05-29 02:48:00	10	12.9285	16.127
2020-05-29 12:54:00	2020-05-29 02:54:00	11	12.9255	15.8517
2020-05-29 13:00:00	2020-05-29 03:00:00	12	12.9242	15.6343
2020-05-29 13:06:00	2020-05-29 03:06:00	13	12.9252	15.8195
2020-05-29 13:12:00	2020-05-29 03:12:00	14	12.9236	15.6229
2020-05-29 13:18:00	2020-05-29 03:18:00	15	12.9218	15.6553
2020-05-29 13:24:00	2020-05-29 03:24:00	16	12.9216	15.7806
2020-05-29 13:30:00	2020-05-29 03:30:00	17	12.9186	15.965
2020-05-29 13:36:00	2020-05-29 03:36:00	18	12.9207	15.7698
2020-05-29 13:42:00	2020-05-29 03:42:00	19	12.9201	16.5409
2020-05-29 13:48:00	2020-05-29 03:48:00	20	12.9188	15.734
2020-05-29 13:54:00	2020-05-29 03:54:00	21	12.918	16.4703
2020-05-29 14:00:00	2020-05-29 04:00:00	22	12.9187	15.1813
2020-05-29 14:06:00	2020-05-29 04:06:00	23	12.9167	15.0956
2020-05-29 14:12:00	2020-05-29 04:12:00	24	12.9174	15.5879
2020-05-29 14:18:00	2020-05-29 04:18:00	25	12.9174	15.6062
2020-05-29 14:24:00	2020-05-29 04:24:00	26	12.9175	14.8388
2020-05-29 14:30:00	2020-05-29 04:30:00	27	12.9149	15.5198
2020-05-29 14:36:00	2020-05-29 04:36:00	28	12.9137	15.1349
2020-05-29 14:42:00	2020-05-29 04:42:00	29	12.9127	15.4473
2020-05-29 14:48:00	2020-05-29 04:48:00	30	12.9132	14.7981
2020-05-29 14:54:00	2020-05-29 04:54:00	31	12.9118	15.2914
2020-05-29 15:00:00	2020-05-29 05:00:00	32	12.9101	15.0747
2020-05-29 15:06:00	2020-05-29 05:06:00	33	12.9113	14.7664
2020-05-29 15:12:00	2020-05-29 05:12:00	34	12.9073	15.1563
2020-05-29 15:18:00	2020-05-29 05:18:00	35	12.9097	15.0466
2020-05-29 15:24:00	2020-05-29 05:24:00	36	12.9093	14.5938
2020-05-29 15:30:00	2020-05-29 05:30:00	37	12.9102	15.5421
2020-05-29 15:36:00	2020-05-29 05:36:00	38	12.9106	15.1278
2020-05-29 15:42:00	2020-05-29 05:42:00	39	12.9109	16.65
2020-05-29 15:48:00	2020-05-29 05:48:00	40	12.909	14.9359
2020-05-29 15:54:00	2020-05-29 05:54:00	41	12.9094	14.9923
2020-05-29 16:00:00	2020-05-29 06:00:00	42	12.9118	15.1154
2020-05-29 16:06:00	2020-05-29 06:06:00	43	12.9094	16.5714
2020-05-29 16:12:00	2020-05-29 06:12:00	44	12.9067	15.5008
2020-05-29 16:18:00	2020-05-29 06:18:00	45	12.9074	15.0421
2020-05-29 16:24:00	2020-05-29 06:24:00	46	12.9059	15.0413
2020-05-29 16:30:00	2020-05-29 06:30:00	47	12.9065	15.1337
2020-05-29 16:36:00	2020-05-29 06:36:00	48	12.9041	14.5556
2020-05-29 16:42:00	2020-05-29 06:42:00	49	12.9057	15.417
2020-05-29 16:48:00	2020-05-29 06:48:00	50	12.9053	15.4253
2020-05-29 16:54:00	2020-05-29 06:54:00	51	12.9069	15.3464
2020-05-29 17:00:00	2020-05-29 07:00:00	52	12.9049	15.9927
2020-05-29 17:06:00	2020-05-29 07:06:00	53	12.9055	15.3854
2020-05-29 17:12:00	2020-05-29 07:12:00	54	12.9034	14.7796
2020-05-29 17:18:00	2020-05-29 07:18:00	55	12.9052	15.4841
2020-05-29 17:24:00	2020-05-29 07:24:00	56	12.9064	14.8848
2020-05-29 17:30:00	2020-05-29 07:30:00	57	12.9046	15.1966
2020-05-29 17:36:00	2020-05-29 07:36:00	58	12.9041	15.4074
2020-05-29 17:42:00	2020-05-29 07:42:00	59	12.9016	15.3244
2020-05-29 17:48:00	2020-05-29 07:48:00	60	12.9036	14.6585
2020-05-29 17:54:00	2020-05-29 07:54:00	61	12.9004	15.8633
2020-05-29 18:00:00	2020-05-29 08:00:00	62	12.9006	15.4221
2020-05-29 18:06:00	2020-05-29 08:06:00	63	12.8992	15.0427
2020-05-29 18:12:00	2020-05-29 08:12:00	64	12.8994	14.4298
2020-05-29 18:18:00	2020-05-29 08:18:00	65	12.8992	15.1547
2020-05-29 18:24:00	2020-05-29 08:24:00	66	12.899	14.921
2020-05-29 18:30:00	2020-05-29 08:30:00	67	12.8951	16.7542
2020-05-29 18:36:00	2020-05-29 08:36:00	68	12.8972	14.6439
2020-05-29 18:42:00	2020-05-29 08:42:00	69	12.8959	14.1309
2020-05-29 18:48:00	2020-05-29 08:48:00	70	12.8962	15.2462
2020-05-29 18:54:00	2020-05-29 08:54:00	71	12.8959	15.1066
2020-05-29 19:00:00	2020-05-29 09:00:00	72	12.8929	15.1388
2020-05-29 19:06:00	2020-05-29 09:06:00	73	12.8952	16.7493
2020-05-29 19:12:00	2020-05-29 09:12:00	74	12.8925	14.8498
2020-05-29 19:18:00	2020-05-29 09:18:00	75	12.8925	14.7697
2020-05-29 19:24:00	2020-05-29 09:24:00	76	12.8939	15.0529
2020-05-29 19:30:00	2020-05-29 09:30:00	77	12.8895	15.0206
2020-05-29 19:36:00	2020-05-29 09:36:00	78	12.8897	14.793
2020-05-29 19:42:00	2020-05-29 09:42:00	79	12.8887	14.9383
2020-05-29 19:48:00	2020-05-29 09:48:00	80	12.8876	15.6333
2020-05-29 19:54:00	2020-05-29 09:54:00	81	12.8887	14.7794
2020-05-29 20:00:00	2020-05-29 10:00:00	82	12.8878	15.5568
2020-05-29 20:06:00	2020-05-29 10:06:00	83	12.8866	14.8618
2020-05-29 20:12:00	2020-05-29 10:12:00	84	12.8863	15.2224
2020-05-29 20:18:00	2020-05-29 10:18:00	85	12.8854	14.5543
2020-05-29 20:24:00	2020-05-29 10:24:00	86	12.8833	14.9392
2020-05-29 20:30:00	2020-05-29 10:30:00	87	12.8854	14.8881
2020-05-29 20:36:00	2020-05-29 10:36:00	88	12.8839	15.0381
2020-05-29 20:42:00	2020-05-29 10:42:00	89	12.882	19.7257
2020-05-29 20:48:00	2020-05-29 10:48:00	90	12.8817	15.0653
2020-05-29 20:54:00	2020-05-29 10:54:00	91	12.8801	24.8527
2020-05-29 21:00:00	2020-05-29 11:00:00	92	12.8805	15.1577
2020-05-29 21:06:00	2020-05-29 11:06:00	93	12.8795	14.9738
2020-05-29 21:12:00	2020-05-29 11:12:00	94	12.8783	18.7635
2020-05-29 21:18:00	2020-05-29 11:18:00	95	12.8782	14.708
2020-05-29 21:24:00	2020-05-29 11:24:00	96	12.8765	15.305
2020-05-29 21:30:00	2020-05-29 11:30:00	97	12.8788	14.7619
2020-05-29 21:36:00	2020-05-29 11:36:00	98	12.8741	14.3203
2020-05-29 21:42:00	2020-05-29 11:42:00	99	12.8755	14.8079
2020-05-29 21:48:00	2020-05-29 11:48:00	100	12.8753	14.5071
2020-05-29 21:54:00	2020-05-29 11:54:00	101	12.875	14.5541
2020-05-29 22:00:00	2020-05-29 12:00:00	102	12.8752	14.2688
2020-05-29 22:06:00	2020-05-29 12:06:00	103	12.8736	14.9091
2020-05-29 22:12:00	2020-05-29 12:12:00	104	12.8736	14.3856
2020-05-29 22:18:00	2020-05-29 12:18:00	105	12.8721	15.0029
2020-05-29 22:24:00	2020-05-29 12:24:00	106	12.8734	14.5149
2020-05-29 22:30:00	2020-05-29 12:30:00	107	12.8732	16.3816
2020-05-29 22:36:00	2020-05-29 12:36:00	108	12.8727	15.4978
2020-05-29 22:42:00	2020-05-29 12:42:00	109	12.8715	14.2139
2020-05-29 22:48:00	2020-05-29 12:48:00	110	12.8713	14.9072
2020-05-29 22:54:00	2020-05-29 12:54:00	111	12.8724	14.8008
2020-05-29 23:00:00	2020-05-29 13:00:00	112	12.8721	15.35
2020-05-29 23:06:00	2020-05-29 13:06:00	113	12.8708	14.5684
2020-05-29 23:12:00	2020-05-29 13:12:00	114	12.8693	15.1359
2020-05-29 23:18:00	2020-05-29 13:18:00	115	12.8683	14.1604
2020-05-29 23:24:00	2020-05-29 13:24:00	116	12.8687	15.0641
2020-05-29 23:30:00	2020-05-29 13:30:00	117	12.8688	14.8911
2020-05-29 23:36:00	2020-05-29 13:36:00	118	12.8675	14.6026
2020-05-29 23:42:00	2020-05-29 13:42:00	119	12.8648	14.8167
2020-05-29 23:48:00	2020-05-29 13:48:00	120	12.8647	14.2593
2020-05-29 23:54:00	2020-05-29 13:54:00	121	12.8656	14.9373
2020-05-30	2020-05-29 14:00:00	122	12.862	14.4483
2020-05-30 00:06:00	2020-05-29 14:06:00	123	12.8643	15.9557
2020-05-30 00:12:00	2020-05-29 14:12:00	124	12.862	15.0549
2020-05-30 00:18:00	2020-05-29 14:18:00	125	12.8605	14.1087
2020-05-30 00:24:00	2020-05-29 14:24:00	126	12.861	14.9516
2020-05-30 00:30:00	2020-05-29 14:30:00	127	12.8627	14.9957
2020-05-30 00:36:00	2020-05-29 14:36:00	128	12.8613	15.3222
2020-05-30 00:42:00	2020-05-29 14:42:00	129	12.861	15.3382
2020-05-30 00:48:00	2020-05-29 14:48:00	130	12.8602	15.2428
2020-05-30 00:54:00	2020-05-29 14:54:00	131	12.8588	14.3679
2020-05-30 01:00:00	2020-05-29 15:00:00	132	12.8593	14.9263
2020-05-30 01:06:00	2020-05-29 15:06:00	133	12.8598	14.6571
2020-05-30 01:12:00	2020-05-29 15:12:00	134	12.8594	15.802
2020-05-30 01:18:00	2020-05-29 15:18:00	135	12.8591	14.533
2020-05-30 01:24:00	2020-05-29 15:24:00	136	12.8589	14.5159
2020-05-30 01:30:00	2020-05-29 15:30:00	137	12.8564	15.1826
2020-05-30 01:36:00	2020-05-29 15:36:00	138	12.8576	15.0027
2020-05-30 01:42:00	2020-05-29 15:42:00	139	12.8576	15.4422
2020-05-30 01:48:00	2020-05-29 15:48:00	140	12.8563	14.5948
2020-05-30 01:54:00	2020-05-29 15:54:00	141	12.8556	14.7275
2020-05-30 02:00:00	2020-05-29 16:00:00	142	12.8554	14.6887
2020-05-30 02:06:00	2020-05-29 16:06:00	143	12.8563	14.3885
2020-05-30 02:12:00	2020-05-29 16:12:00	144	12.8545	14.7409
2020-05-30 02:18:00	2020-05-29 16:18:00	145	12.854	14.8484
2020-05-30 02:24:00	2020-05-29 16:24:00	146	12.8541	14.8329
2020-05-30 02:30:00	2020-05-29 16:30:00	147	12.8536	20.9829
2020-05-30 02:36:00	2020-05-29 16:36:00	148	12.8523	15.0138
2020-05-30 02:42:00	2020-05-29 16:42:00	149	12.8532	15.1207
2020-05-30 02:48:00	2020-05-29 16:48:00	150	12.8521	14.8995
2020-05-30 02:54:00	2020-05-29 16:54:00	151	12.8508	14.5755
2020-05-30 03:00:00	2020-05-29 17:00:00	152	12.8507	14.6783
2020-05-30 03:06:00	2020-05-29 17:06:00	153	12.8501	14.1909
2020-05-30 03:12:00	2020-05-29 17:12:00	154	12.8496	14.5373
2020-05-30 03:18:00	2020-05-29 17:18:00	155	12.8508	16.3399
2020-05-30 03:24:00	2020-05-29 17:24:00	156	12.8496	14.6537
2020-05-30 03:30:00	2020-05-29 17:30:00	157	12.8503	14.2326
2020-05-30 03:36:00	2020-05-29 17:36:00	158	12.8461	14.6966
2020-05-30 03:42:00	2020-05-29 17:42:00	159	12.8484	14.2163
2020-05-30 03:48:00	2020-05-29 17:48:00	160	12.8474	14.0541
2020-05-30 03:54:00	2020-05-29 17:54:00	161	12.8456	14.8401
2020-05-30 04:00:00	2020-05-29 18:00:00	162	12.8478	14.5157
2020-05-30 04:06:00	2020-05-29 18:06:00	163	12.8489	15.067
2020-05-30 04:12:00	2020-05-29 18:12:00	164	12.8466	13.8728
2020-05-30 04:18:00	2020-05-29 18:18:00	165	12.8455	14.0814
2020-05-30 04:24:00	2020-05-29 18:24:00	166	12.8478	14.5468
2020-05-30 04:30:00	2020-05-29 18:30:00	167	12.8472	14.5026
2020-05-30 04:36:00	2020-05-29 18:36:00	168	12.8473	14.7131
2020-05-30 04:42:00	2020-05-29 18:42:00	169	12.8449	13.7947
2020-05-30 04:48:00	2020-05-29 18:48:00	170	12.8455	14.0676
2020-05-30 04:54:00	2020-05-29 18:54:00	171	12.845	14.2845
2020-05-30 05:00:00	2020-05-29 19:00:00	172	12.8431	14.5995
2020-05-30 05:06:00	2020-05-29 19:06:00	173	12.8436	14.125
2020-05-30 05:12:00	2020-05-29 19:12:00	174	12.8449	13.93
2020-05-30 05:18:00	2020-05-29 19:18:00	175	12.8447	15.1492
2020-05-30 05:24:00	2020-05-29 19:24:00	176	12.8431	13.779
2020-05-30 05:30:00	2020-05-29 19:30:00	177	12.8427	14.3926
2020-05-30 05:36:00	2020-05-29 19:36:00	178	12.8426	14.5806
2020-05-30 05:42:00	2020-05-29 19:42:00	179	12.8442	13.9379
2020-05-30 05:48:00	2020-05-29 19:48:00	180	12.8414	14.0814
2020-05-30 05:54:00	2020-05-29 19:54:00	181	12.8427	13.9536
2020-05-30 06:00:00	2020-05-29 20:00:00	182	12.8408	13.6547
2020-05-30 06:06:00	2020-05-29 20:06:00	183	12.8401	14.2314
2020-05-30 06:12:00	2020-05-29 20:12:00	184	12.8408	14.2491
2020-05-30 06:18:00	2020-05-29 20:18:00	185	12.8403	14.4365
2020-05-30 06:24:00	2020-05-29 20:24:00	186	12.839	13.557
2020-05-30 06:30:00	2020-05-29 20:30:00	187	12.8398	13.9111
2020-05-30 06:36:00	2020-05-29 20:36:00	188	12.8401	13.5924
2020-05-30 06:42:00	2020-05-29 20:42:00	189	12.8383	13.5273
2020-05-30 06:48:00	2020-05-29 20:48:00	190	12.8375	13.8183
2020-05-30 06:54:00	2020-05-29 20:54:00	191	12.8356	13.7778
2020-05-30 07:00:00	2020-05-29 21:00:00	192	12.8381	13.5088
2020-05-30 07:06:00	2020-05-29 21:06:00	193	12.8375	14.3919
2020-05-30 07:12:00	2020-05-29 21:12:00	194	12.8387	13.7481
2020-05-30 07:18:00	2020-05-29 21:18:00	195	12.8356	14.0749
2020-05-30 07:24:00	2020-05-29 21:24:00	196	12.8383	14.8694
2020-05-30 07:30:00	2020-05-29 21:30:00	197	12.8363	14.3036
2020-05-30 07:36:00	2020-05-29 21:36:00	198	12.8344	14.3388
2020-05-30 07:42:00	2020-05-29 21:42:00	199	12.8363	14.0686
2020-05-30 07:48:00	2020-05-29 21:48:00	200	12.835	14.246
2020-05-30 07:54:00	2020-05-29 21:54:00	201	12.8361	14.0193
2020-05-30 08:00:00	2020-05-29 22:00:00	202	12.8336	14.3248
2020-05-30 08:06:00	2020-05-29 22:06:00	203	12.8342	14.1205
2020-05-30 08:12:00	2020-05-29 22:12:00	204	12.8356	14.2912
2020-05-30 08:18:00	2020-05-29 22:18:00	205	12.8322	14.1703
2020-05-30 08:24:00	2020-05-29 22:24:00	206	12.8295	13.4125
2020-05-30 08:30:00	2020-05-29 22:30:00	207	12.8314	14.1349
2020-05-30 08:36:00	2020-05-29 22:36:00	208	12.8311	14.1012
2020-05-30 08:42:00	2020-05-29 22:42:00	209	12.8305	13.8085
2020-05-30 08:48:00	2020-05-29 22:48:00	210	12.8296	14.3551
2020-05-30 08:54:00	2020-05-29 22:54:00	211	12.8271	13.9793
2020-05-30 09:00:00	2020-05-29 23:00:00	212	12.8272	14.4394
2020-05-30 09:06:00	2020-05-29 23:06:00	213	12.8285	14.0869
2020-05-30 09:12:00	2020-05-29 23:12:00	214	12.8249	14.0584
2020-05-30 09:18:00	2020-05-29 23:18:00	215	12.8277	16.2015
2020-05-30 09:24:00	2020-05-29 23:24:00	216	12.8268	14.2855
2020-05-30 09:30:00	2020-05-29 23:30:00	217	12.8266	14.067
2020-05-30 09:36:00	2020-05-29 23:36:00	218	12.8256	14.2528
2020-05-30 09:42:00	2020-05-29 23:42:00	219	12.8278	14.7827
2020-05-30 09:48:00	2020-05-29 23:48:00	220	12.8247	14.0002
2020-05-30 09:54:00	2020-05-29 23:54:00	221	12.8263	14.6677
2020-05-30 10:00:00	2020-05-30	222	12.8261	14.904
2020-05-30 10:06:00	2020-05-30 00:06:00	223	12.8244	13.9099
2020-05-30 10:12:00	2020-05-30 00:12:00	224	12.8249	13.7664
2020-05-30 10:18:00	2020-05-30 00:18:00	225	12.8266	14.7513
2020-05-30 10:24:00	2020-05-30 00:24:00	226	12.8263	14.0261
2020-05-30 10:30:00	2020-05-30 00:30:00	227	12.8254	13.9563
2020-05-30 10:36:00	2020-05-30 00:36:00	228	12.824	14.9188
2020-05-30 10:42:00	2020-05-30 00:42:00	229	12.8295	14.1846
2020-05-30 10:48:00	2020-05-30 00:48:00	230	12.8259	14.439
2020-05-30 10:54:00	2020-05-30 00:54:00	231	12.8281	14.2442
2020-05-30 11:00:00	2020-05-30 01:00:00	232	12.8283	14.8934
2020-05-30 11:06:00	2020-05-30 01:06:00	233	12.8273	15.73
2020-05-30 11:12:00	2020-05-30 01:12:00	234	12.831	14.4121
2020-05-30 11:18:00	2020-05-30 01:18:00	235	12.8294	14.4355
2020-05-30 11:24:00	2020-05-30 01:24:00	236	12.8319	13.755
2020-05-30 11:30:00	2020-05-30 01:30:00	237	12.8285	16.4978
2020-05-30 11:36:00	2020-05-30 01:36:00	238	12.8311	13.9813
2020-05-30 11:42:00	2020-05-30 01:42:00	239	12.8323	14.4848
2020-05-30 11:48:00	2020-05-30 01:48:00	240	12.8331	14.4076
2020-05-30 11:54:00	2020-05-30 01:54:00	241	12.8343	14.2442
2020-05-30 12:00:00	2020-05-30 02:00:00	242	12.8344	15.2859
2020-05-30 12:06:00	2020-05-30 02:06:00	243	12.8347	14.3297
2020-05-30 12:12:00	2020-05-30 02:12:00	244	12.835	13.3183
2020-05-30 12:18:00	2020-05-30 02:18:00	245	12.8333	13.9227
2020-05-30 12:24:00	2020-05-30 02:24:00	246	12.834	14.219
2020-05-30 12:30:00	2020-05-30 02:30:00	247	12.8344	14.0751
2020-05-30 12:36:00	2020-05-30 02:36:00	248	12.8343	19.7511
2020-05-30 12:42:00	2020-05-30 02:42:00	249	12.8347	14.6927
2020-05-30 12:48:00	2020-05-30 02:48:00	250	12.8333	13.8596
2020-05-30 12:54:00	2020-05-30 02:54:00	251	12.8322	14.0649
2020-05-30 13:00:00	2020-05-30 03:00:00	252	12.8361	14.1121
2020-05-30 13:06:00	2020-05-30 03:06:00	253	12.8346	14.6433
2020-05-30 13:12:00	2020-05-30 03:12:00	254	12.8368	15.1821
2020-05-30 13:18:00	2020-05-30 03:18:00	255	12.8349	14.5761
2020-05-30 13:24:00	2020-05-30 03:24:00	256	12.837	14.3704
2020-05-30 13:30:00	2020-05-30 03:30:00	257	12.8358	14.5629
2020-05-30 13:36:00	2020-05-30 03:36:00	258	12.8375	14.2642
2020-05-30 13:42:00	2020-05-30 03:42:00	259	12.837	14.456
2020-05-30 13:48:00	2020-05-30 03:48:00	260	12.8366	14.4363
2020-05-30 13:54:00	2020-05-30 03:54:00	261	12.8389	14.743
2020-05-30 14:00:00	2020-05-30 04:00:00	262	12.8386	13.6948
2020-05-30 14:06:00	2020-05-30 04:06:00	263	12.838	25.0175
2020-05-30 14:12:00	2020-05-30 04:12:00	264	12.839	14.2462
2020-05-30 14:18:00	2020-05-30 04:18:00	265	12.8413	14.1319
2020-05-30 14:24:00	2020-05-30 04:24:00	266	12.8408	14.3958
2020-05-30 14:30:00	2020-05-30 04:30:00	267	12.8389	14.5281
2020-05-30 14:36:00	2020-05-30 04:36:00	268	12.8373	13.8044
2020-05-30 14:42:00	2020-05-30 04:42:00	269	12.8423	14.7965
2020-05-30 14:48:00	2020-05-30 04:48:00	270	12.8435	14.5228
2020-05-30 14:54:00	2020-05-30 04:54:00	271	12.8436	13.9373
2020-05-30 15:00:00	2020-05-30 05:00:00	272	12.8417	14.0759
2020-05-30 15:06:00	2020-05-30 05:06:00	273	12.8403	13.9843
2020-05-30 15:12:00	2020-05-30 05:12:00	274	12.8422	13.8997
2020-05-30 15:18:00	2020-05-30 05:18:00	275	12.8449	14.5938
2020-05-30 15:24:00	2020-05-30 05:24:00	276	12.8432	13.7131
2020-05-30 15:30:00	2020-05-30 05:30:00	277	12.843	13.9858
2020-05-30 15:36:00	2020-05-30 05:36:00	278	12.8431	14.153
2020-05-30 15:42:00	2020-05-30 05:42:00	279	12.8426	13.7784
2020-05-30 15:48:00	2020-05-30 05:48:00	280	12.8416	13.7137
2020-05-30 15:54:00	2020-05-30 05:54:00	281	12.8416	13.6091
2020-05-30 16:00:00	2020-05-30 06:00:00	282	12.8451	13.3669
2020-05-30 16:06:00	2020-05-30 06:06:00	283	12.8446	13.6388
2020-05-30 16:12:00	2020-05-30 06:12:00	284	12.8431	13.5065
2020-05-30 16:18:00	2020-05-30 06:18:00	285	12.8438	13.7764
2020-05-30 16:24:00	2020-05-30 06:24:00	286	12.844	13.7912
2020-05-30 16:30:00	2020-05-30 06:30:00	287	12.8437	14.8156
2020-05-30 16:36:00	2020-05-30 06:36:00	288	12.8447	14.3511
2020-05-30 16:42:00	2020-05-30 06:42:00	289	12.8415	15.4506
2020-05-30 16:48:00	2020-05-30 06:48:00	290	12.841	15.3726
2020-05-30 16:54:00	2020-05-30 06:54:00	291	12.8407	15.9957
2020-05-30 17:00:00	2020-05-30 07:00:00	292	12.8428	15.8222
2020-05-30 17:06:00	2020-05-30 07:06:00	293	12.8416	16.081
2020-05-30 17:12:00	2020-05-30 07:12:00	294	12.84	15.8264
2020-05-30 17:18:00	2020-05-30 07:18:00	295	12.8406	16.3346
2020-05-30 17:24:00	2020-05-30 07:24:00	296	12.8389	15.5108
2020-05-30 17:30:00	2020-05-30 07:30:00	297	12.8409	14.8295
2020-05-30 17:36:00	2020-05-30 07:36:00	298	12.8387	14.1476
2020-05-30 17:42:00	2020-05-30 07:42:00	299	12.8408	14.9426
2020-05-30 17:48:00	2020-05-30 07:48:00	300	12.8392	15.3954
2020-05-30 17:54:00	2020-05-30 07:54:00	301	12.8384	14.5757
2020-05-30 18:00:00	2020-05-30 08:00:00	302	12.838	14.7094
2020-05-30 18:06:00	2020-05-30 08:06:00	303	12.8356	14.733
2020-05-30 18:12:00	2020-05-30 08:12:00	304	12.8367	13.9754
2020-05-30 18:18:00	2020-05-30 08:18:00	305	12.8375	14.7491
2020-05-30 18:24:00	2020-05-30 08:24:00	306	12.8359	14.778
2020-05-30 18:30:00	2020-05-30 08:30:00	307	12.8368	15.01
2020-05-30 18:36:00	2020-05-30 08:36:00	308	12.8373	14.8706
2020-05-30 18:42:00	2020-05-30 08:42:00	309	12.8355	14.3679
2020-05-30 18:48:00	2020-05-30 08:48:00	310	12.8358	14.8175
2020-05-30 18:54:00	2020-05-30 08:54:00	311	12.8358	14.1675
2020-05-30 19:00:00	2020-05-30 09:00:00	312	12.8351	14.7869
2020-05-30 19:06:00	2020-05-30 09:06:00	313	12.8309	14.2491
2020-05-30 19:12:00	2020-05-30 09:12:00	314	12.8324	13.5283
2020-05-30 19:18:00	2020-05-30 09:18:00	315	12.834	14.4717
2020-05-30 19:24:00	2020-05-30 09:24:00	316	12.8317	14.4015
2020-05-30 19:30:00	2020-05-30 09:30:00	317	12.8316	14.2886
2020-05-30 19:36:00	2020-05-30 09:36:00	318	12.8314	14.1537
2020-05-30 19:42:00	2020-05-30 09:42:00	319	12.8289	13.894
2020-05-30 19:48:00	2020-05-30 09:48:00	320	12.8309	14.0552
2020-05-30 19:54:00	2020-05-30 09:54:00	321	12.8302	14.1482
2020-05-30 20:00:00	2020-05-30 10:00:00	322	12.8305	15.0627
2020-05-30 20:06:00	2020-05-30 10:06:00	323	12.8305	15.0657
2020-05-30 20:12:00	2020-05-30 10:12:00	324	12.8291	15.1473
2020-05-30 20:18:00	2020-05-30 10:18:00	325	12.8283	15.3689
2020-05-30 20:24:00	2020-05-30 10:24:00	326	12.8307	14.5716
2020-05-30 20:30:00	2020-05-30 10:30:00	327	12.8278	14.5574
2020-05-30 20:36:00	2020-05-30 10:36:00	328	12.8297	15.4713
2020-05-30 20:42:00	2020-05-30 10:42:00	329	12.8268	14.3997
2020-05-30 20:48:00	2020-05-30 10:48:00	330	12.828	16.9115
2020-05-30 20:54:00	2020-05-30 10:54:00	331	12.8288	15.1398
2020-05-30 21:00:00	2020-05-30 11:00:00	332	12.8273	14.7603
2020-05-30 21:06:00	2020-05-30 11:06:00	333	12.8256	14.1679
2020-05-30 21:12:00	2020-05-30 11:12:00	334	12.8271	14.1258
2020-05-30 21:18:00	2020-05-30 11:18:00	335	12.829	14.5466
2020-05-30 21:24:00	2020-05-30 11:24:00	336	12.828	14.4852
2020-05-30 21:30:00	2020-05-30 11:30:00	337	12.8279	14.0712
2020-05-30 21:36:00	2020-05-30 11:36:00	338	12.828	13.7839
2020-05-30 21:42:00	2020-05-30 11:42:00	339	12.8271	14.488
2020-05-30 21:48:00	2020-05-30 11:48:00	340	12.8279	15.09
2020-05-30 21:54:00	2020-05-30 11:54:00	341	12.8254	14.5155
2020-05-30 22:00:00	2020-05-30 12:00:00	342	12.8275	14.697
2020-05-30 22:06:00	2020-05-30 12:06:00	343	12.8256	15.394
2020-05-30 22:12:00	2020-05-30 12:12:00	344	12.8265	14.9823
2020-05-30 22:18:00	2020-05-30 12:18:00	345	12.824	14.0193
2020-05-30 22:24:00	2020-05-30 12:24:00	346	12.8251	13.8915
2020-05-30 22:30:00	2020-05-30 12:30:00	347	12.8246	13.9902
2020-05-30 22:36:00	2020-05-30 12:36:00	348	12.8217	14.3753
2020-05-30 22:42:00	2020-05-30 12:42:00	349	12.8231	15.4243
2020-05-30 22:48:00	2020-05-30 12:48:00	350	12.8215	13.9868
2020-05-30 22:54:00	2020-05-30 12:54:00	351	12.8245	13.907
2020-05-30 23:00:00	2020-05-30 13:00:00	352	12.8222	13.7692
2020-05-30 23:06:00	2020-05-30 13:06:00	353	12.8244	15.9972
2020-05-30 23:12:00	2020-05-30 13:12:00	354	12.826	13.7841
2020-05-30 23:18:00	2020-05-30 13:18:00	355	12.8235	14.429
2020-05-30 23:24:00	2020-05-30 13:24:00	356	12.8229	14.0354
2020-05-30 23:30:00	2020-05-30 13:30:00	357	12.8249	14.1569
2020-05-30 23:36:00	2020-05-30 13:36:00	358	12.824	14.2503
2020-05-30 23:42:00	2020-05-30 13:42:00	359	12.8229	13.8443
2020-05-30 23:48:00	2020-05-30 13:48:00	360	12.8235	14.0012
2020-05-30 23:54:00	2020-05-30 13:54:00	361	12.8253	13.6303
2020-05-31	2020-05-30 14:00:00	362	12.8236	13.5301
2020-05-31 00:06:00	2020-05-30 14:06:00	363	12.8232	14.3569
2020-05-31 00:12:00	2020-05-30 14:12:00	364	12.8229	13.374
2020-05-31 00:18:00	2020-05-30 14:18:00	365	12.821	13.7129
2020-05-31 00:24:00	2020-05-30 14:24:00	366	12.8231	14.5185
2020-05-31 00:30:00	2020-05-30 14:30:00	367	12.8226	14.5287
2020-05-31 00:36:00	2020-05-30 14:36:00	368	12.8225	16.3555
2020-05-31 00:42:00	2020-05-30 14:42:00	369	12.8238	32.0342
2020-05-31 00:48:00	2020-05-30 14:48:00	370	12.8238	14.2332
2020-05-31 00:54:00	2020-05-30 14:54:00	371	12.8235	14.3504
2020-05-31 01:00:00	2020-05-30 15:00:00	372	12.8205	14.8244
2020-05-31 01:06:00	2020-05-30 15:06:00	373	12.8233	15.1567
2020-05-31 01:12:00	2020-05-30 15:12:00	374	12.822	32.2969
2020-05-31 01:18:00	2020-05-30 15:18:00	375	12.8226	16.0045
2020-05-31 01:24:00	2020-05-30 15:24:00	376	12.8219	15.2102
2020-05-31 01:30:00	2020-05-30 15:30:00	377	12.8203	14.2255
2020-05-31 01:36:00	2020-05-30 15:36:00	378	12.8233	17.9493
2020-05-31 01:42:00	2020-05-30 15:42:00	379	12.8235	14.8588
2020-05-31 01:48:00	2020-05-30 15:48:00	380	12.8235	14.1482
2020-05-31 01:54:00	2020-05-30 15:54:00	381	12.8222	14.3452
2020-05-31 02:00:00	2020-05-30 16:00:00	382	12.8225	14.2507
2020-05-31 02:06:00	2020-05-30 16:06:00	383	12.822	13.6125
2020-05-31 02:12:00	2020-05-30 16:12:00	384	12.8244	14.0436
2020-05-31 02:18:00	2020-05-30 16:18:00	385	12.821	13.3476
2020-05-31 02:24:00	2020-05-30 16:24:00	386	12.8224	13.8036
2020-05-31 02:30:00	2020-05-30 16:30:00	387	12.8213	14.1085
2020-05-31 02:36:00	2020-05-30 16:36:00	388	12.8215	13.235
2020-05-31 02:42:00	2020-05-30 16:42:00	389	12.8208	14.0948
2020-05-31 02:48:00	2020-05-30 16:48:00	390	12.8216	14.2253
2020-05-31 02:54:00	2020-05-30 16:54:00	391	12.8227	13.9497
2020-05-31 03:00:00	2020-05-30 17:00:00	392	12.8187	13.2623
2020-05-31 03:06:00	2020-05-30 17:06:00	393	12.8226	13.7804
2020-05-31 03:12:00	2020-05-30 17:12:00	394	12.8199	13.8008
2020-05-31 03:18:00	2020-05-30 17:18:00	395	12.8201	13.4308
2020-05-31 03:24:00	2020-05-30 17:24:00	396	12.8201	13.533
2020-05-31 03:30:00	2020-05-30 17:30:00	397	12.8205	13.3317
2020-05-31 03:36:00	2020-05-30 17:36:00	398	12.8216	13.4797
2020-05-31 03:42:00	2020-05-30 17:42:00	399	12.821	13.6728
2020-05-31 03:48:00	2020-05-30 17:48:00	400	12.8168	13.2642
2020-05-31 03:54:00	2020-05-30 17:54:00	401	12.8175	12.8142
2020-05-31 04:00:00	2020-05-30 18:00:00	402	12.8201	13.6901
2020-05-31 04:06:00	2020-05-30 18:06:00	403	12.8194	13.5389
2020-05-31 04:12:00	2020-05-30 18:12:00	404	12.82	13.5077
2020-05-31 04:18:00	2020-05-30 18:18:00	405	12.8171	13.4233
2020-05-31 04:24:00	2020-05-30 18:24:00	406	12.8194	13.8504
2020-05-31 04:30:00	2020-05-30 18:30:00	407	12.8188	13.3523
2020-05-31 04:36:00	2020-05-30 18:36:00	408	12.8199	13.208
2020-05-31 04:42:00	2020-05-30 18:42:00	409	12.8209	13.1331
2020-05-31 04:48:00	2020-05-30 18:48:00	410	12.8212	13.0342
2020-05-31 04:54:00	2020-05-30 18:54:00	411	12.8204	12.8698
2020-05-31 05:00:00	2020-05-30 19:00:00	412	12.818	15.0112
2020-05-31 05:06:00	2020-05-30 19:06:00	413	12.8194	13.3903
2020-05-31 05:12:00	2020-05-30 19:12:00	414	12.8203	13.1471
2020-05-31 05:18:00	2020-05-30 19:18:00	415	12.82	13.871
2020-05-31 05:24:00	2020-05-30 19:24:00	416	12.8198	13.5857
2020-05-31 05:30:00	2020-05-30 19:30:00	417	12.8172	12.8708
2020-05-31 05:36:00	2020-05-30 19:36:00	418	12.8212	13.6243
2020-05-31 05:42:00	2020-05-30 19:42:00	419	12.8176	12.9799
2020-05-31 05:48:00	2020-05-30 19:48:00	420	12.8208	13.4274
2020-05-31 05:54:00	2020-05-30 19:54:00	421	12.8174	13.347
2020-05-31 06:00:00	2020-05-30 20:00:00	422	12.8185	13.1437
2020-05-31 06:06:00	2020-05-30 20:06:00	423	12.8176	13.0887
2020-05-31 06:12:00	2020-05-30 20:12:00	424	12.8182	12.6404
2020-05-31 06:18:00	2020-05-30 20:18:00	425	12.817	12.6945
2020-05-31 06:24:00	2020-05-30 20:24:00	426	12.8178	13.1712
2020-05-31 06:30:00	2020-05-30 20:30:00	427	12.8165	13.128
2020-05-31 06:36:00	2020-05-30 20:36:00	428	12.8179	13.3191
2020-05-31 06:42:00	2020-05-30 20:42:00	429	12.8169	13.1783
2020-05-31 06:48:00	2020-05-30 20:48:00	430	12.8172	13.6803
2020-05-31 06:54:00	2020-05-30 20:54:00	431	12.8174	13.022
2020-05-31 07:00:00	2020-05-30 21:00:00	432	12.8191	13.045
2020-05-31 07:06:00	2020-05-30 21:06:00	433	12.8159	12.8057
2020-05-31 07:12:00	2020-05-30 21:12:00	434	12.8177	13.2584
2020-05-31 07:18:00	2020-05-30 21:18:00	435	12.8178	13.0517
2020-05-31 07:24:00	2020-05-30 21:24:00	436	12.8178	13.6598
2020-05-31 07:30:00	2020-05-30 21:30:00	437	12.8154	12.7975
2020-05-31 07:36:00	2020-05-30 21:36:00	438	12.8177	13.7574
2020-05-31 07:42:00	2020-05-30 21:42:00	439	12.818	13.231
2020-05-31 07:48:00	2020-05-30 21:48:00	440	12.8179	13.8854
2020-05-31 07:54:00	2020-05-30 21:54:00	441	12.8154	13.7098
2020-05-31 08:00:00	2020-05-30 22:00:00	442	12.8163	13.3482
2020-05-31 08:06:00	2020-05-30 22:06:00	443	12.8177	15.2782
2020-05-31 08:12:00	2020-05-30 22:12:00	444	12.8171	13.7513
2020-05-31 08:18:00	2020-05-30 22:18:00	445	12.8157	12.9984
2020-05-31 08:24:00	2020-05-30 22:24:00	446	12.8178	13.4512
2020-05-31 08:30:00	2020-05-30 22:30:00	447	12.8156	13.254
2020-05-31 08:36:00	2020-05-30 22:36:00	448	12.8148	14.4968
2020-05-31 08:42:00	2020-05-30 22:42:00	449	12.8164	13.4465
2020-05-31 08:48:00	2020-05-30 22:48:00	450	12.814	13.1254
2020-05-31 08:54:00	2020-05-30 22:54:00	451	12.815	13.7454
2020-05-31 09:00:00	2020-05-30 23:00:00	452	12.8156	13.2446
2020-05-31 09:06:00	2020-05-30 23:06:00	453	12.8167	13.0824
2020-05-31 09:12:00	2020-05-30 23:12:00	454	12.8159	13.2977
2020-05-31 09:18:00	2020-05-30 23:18:00	455	12.8147	13.814
2020-05-31 09:24:00	2020-05-30 23:24:00	456	12.8171	17.3065
2020-05-31 09:30:00	2020-05-30 23:30:00	457	12.8147	13.5106
2020-05-31 09:36:00	2020-05-30 23:36:00	458	12.8143	13.4597
2020-05-31 09:42:00	2020-05-30 23:42:00	459	12.8142	13.4272
2020-05-31 09:48:00	2020-05-30 23:48:00	460	12.8149	13.6056
2020-05-31 09:54:00	2020-05-30 23:54:00	461	12.8147	13.1457
2020-05-31 10:00:00	2020-05-31	462	12.814	12.5118
2020-05-31 10:06:00	2020-05-31 00:06:00	463	12.816	12.965
2020-05-31 10:12:00	2020-05-31 00:12:00	464	12.8161	13.6317
2020-05-31 10:18:00	2020-05-31 00:18:00	465	12.8131	13.4168
2020-05-31 10:24:00	2020-05-31 00:24:00	466	12.8117	12.7595
2020-05-31 10:30:00	2020-05-31 00:30:00	467	12.809	13.6551
2020-05-31 10:36:00	2020-05-31 00:36:00	468	12.8129	12.6414
2020-05-31 10:42:00	2020-05-31 00:42:00	469	12.8129	13.4544
2020-05-31 10:48:00	2020-05-31 00:48:00	470	12.8138	12.9237
2020-05-31 10:54:00	2020-05-31 00:54:00	471	12.8103	12.9383
2020-05-31 11:00:00	2020-05-31 01:00:00	472	12.8105	13.0668
2020-05-31 11:06:00	2020-05-31 01:06:00	473	12.8108	13.6111
2020-05-31 11:12:00	2020-05-31 01:12:00	474	12.8132	12.9815
2020-05-31 11:18:00	2020-05-31 01:18:00	475	12.8143	13.7957
2020-05-31 11:24:00	2020-05-31 01:24:00	476	12.8124	13.7088
2020-05-31 11:30:00	2020-05-31 01:30:00	477	12.8124	13.8812
2020-05-31 11:36:00	2020-05-31 01:36:00	478	12.8119	13.0784
2020-05-31 11:42:00	2020-05-31 01:42:00	479	12.8162	17.7688
2020-05-31 11:48:00	2020-05-31 01:48:00	480	12.8174	13.5824
2020-05-31 11:54:00	2020-05-31 01:54:00	481	12.8152	13.3977
2020-05-31 12:00:00	2020-05-31 02:00:00	482	12.8158	15.2271
2020-05-31 12:06:00	2020-05-31 02:06:00	483	12.8171	13.2753
2020-05-31 12:12:00	2020-05-31 02:12:00	484	12.8177	13.4131
2020-05-31 12:18:00	2020-05-31 02:18:00	485	12.8207	12.6349
2020-05-31 12:24:00	2020-05-31 02:24:00	486	12.8221	14.5564
2020-05-31 12:30:00	2020-05-31 02:30:00	487	12.8226	12.7228
2020-05-31 12:36:00	2020-05-31 02:36:00	488	12.8235	12.7609
2020-05-31 12:42:00	2020-05-31 02:42:00	489	12.8195	13.2047
2020-05-31 12:48:00	2020-05-31 02:48:00	490	12.8225	13.7796
2020-05-31 12:54:00	2020-05-31 02:54:00	491	12.8233	13.293
2020-05-31 13:00:00	2020-05-31 03:00:00	492	12.8217	17.0246
2020-05-31 13:06:00	2020-05-31 03:06:00	493	12.8247	13.3863
2020-05-31 13:12:00	2020-05-31 03:12:00	494	12.8227	14.4622
2020-05-31 13:18:00	2020-05-31 03:18:00	495	12.8228	14.9351
2020-05-31 13:24:00	2020-05-31 03:24:00	496	12.8261	30.1616
2020-05-31 13:30:00	2020-05-31 03:30:00	497	12.8247	13.0252
2020-05-31 13:36:00	2020-05-31 03:36:00	498	12.8227	13.2723
2020-05-31 13:42:00	2020-05-31 03:42:00	499	12.825	13.269
2020-05-31 13:48:00	2020-05-31 03:48:00	500	12.8222	13.476
2020-05-31 13:54:00	2020-05-31 03:54:00	501	12.8212	14.3492
2020-05-31 14:00:00	2020-05-31 04:00:00	502	12.8217	13.3431
2020-05-31 14:06:00	2020-05-31 04:06:00	503	12.8231	12.93
2020-05-31 14:12:00	2020-05-31 04:12:00	504	12.8212	13.0721
2020-05-31 14:18:00	2020-05-31 04:18:00	505	12.827	13.6551
2020-05-31 14:24:00	2020-05-31 04:24:00	506	12.8232	12.7599
2020-05-31 14:30:00	2020-05-31 04:30:00	507	12.8254	14.2568
2020-05-31 14:36:00	2020-05-31 04:36:00	508	12.8232	12.5071
2020-05-31 14:42:00	2020-05-31 04:42:00	509	12.8247	14.2009
2020-05-31 14:48:00	2020-05-31 04:48:00	510	12.8254	13.6172
2020-05-31 14:54:00	2020-05-31 04:54:00	511	12.8254	13.1235
2020-05-31 15:00:00	2020-05-31 05:00:00	512	12.8254	12.9072
2020-05-31 15:06:00	2020-05-31 05:06:00	513	12.8247	13.3301
2020-05-31 15:12:00	2020-05-31 05:12:00	514	12.8289	13.3403
2020-05-31 15:18:00	2020-05-31 05:18:00	515	12.8274	13.4359
2020-05-31 15:24:00	2020-05-31 05:24:00	516	12.8262	13.3614
2020-05-31 15:30:00	2020-05-31 05:30:00	517	12.8256	13.0619
2020-05-31 15:36:00	2020-05-31 05:36:00	518	12.8276	13.652
2020-05-31 15:42:00	2020-05-31 05:42:00	519	12.8294	13.0151
2020-05-31 15:48:00	2020-05-31 05:48:00	520	12.8298	13.4715
2020-05-31 15:54:00	2020-05-31 05:54:00	521	12.8291	12.8826
2020-05-31 16:00:00	2020-05-31 06:00:00	522	12.8281	14.0136
2020-05-31 16:06:00	2020-05-31 06:06:00	523	12.8294	13.2422
2020-05-31 16:12:00	2020-05-31 06:12:00	524	12.8317	12.9626
2020-05-31 16:18:00	2020-05-31 06:18:00	525	12.8285	13.1388
2020-05-31 16:24:00	2020-05-31 06:24:00	526	12.8308	13.0649
2020-05-31 16:30:00	2020-05-31 06:30:00	527	12.83	13.162
2020-05-31 16:36:00	2020-05-31 06:36:00	528	12.8306	12.9831
2020-05-31 16:42:00	2020-05-31 06:42:00	529	12.8299	12.8891
2020-05-31 16:48:00	2020-05-31 06:48:00	530	12.8324	15.0873
2020-05-31 16:54:00	2020-05-31 06:54:00	531	12.831	14.8885
2020-05-31 17:00:00	2020-05-31 07:00:00	532	12.8292	15.324
2020-05-31 17:06:00	2020-05-31 07:06:00	533	12.8305	13.8549
2020-05-31 17:12:00	2020-05-31 07:12:00	534	12.8312	13.6364
2020-05-31 17:18:00	2020-05-31 07:18:00	535	12.8301	14.183
2020-05-31 17:24:00	2020-05-31 07:24:00	536	12.8287	13.0324
2020-05-31 17:30:00	2020-05-31 07:30:00	537	12.8308	12.639
2020-05-31 17:36:00	2020-05-31 07:36:00	538	12.8299	12.7774
2020-05-31 17:42:00	2020-05-31 07:42:00	539	12.8308	13.1667
2020-05-31 17:48:00	2020-05-31 07:48:00	540	12.8318	12.8517
2020-05-31 17:54:00	2020-05-31 07:54:00	541	12.8292	12.2603
2020-05-31 18:00:00	2020-05-31 08:00:00	542	12.8292	12.486
2020-05-31 18:06:00	2020-05-31 08:06:00	543	12.8277	12.3513
2020-05-31 18:12:00	2020-05-31 08:12:00	544	12.8279	12.9131
2020-05-31 18:18:00	2020-05-31 08:18:00	545	12.8284	13.0934
2020-05-31 18:24:00	2020-05-31 08:24:00	546	12.8267	12.0588
2020-05-31 18:30:00	2020-05-31 08:30:00	547	12.8282	12.8728
2020-05-31 18:36:00	2020-05-31 08:36:00	548	12.8268	12.8423
2020-05-31 18:42:00	2020-05-31 08:42:00	549	12.8272	12.338
2020-05-31 18:48:00	2020-05-31 08:48:00	550	12.8292	12.3525
2020-05-31 18:54:00	2020-05-31 08:54:00	551	12.8273	13.3232
2020-05-31 19:00:00	2020-05-31 09:00:00	552	12.8249	12.1449
2020-05-31 19:06:00	2020-05-31 09:06:00	553	12.827	12.7664
2020-05-31 19:12:00	2020-05-31 09:12:00	554	12.8268	12.6528
2020-05-31 19:18:00	2020-05-31 09:18:00	555	12.8241	12.8384
2020-05-31 19:24:00	2020-05-31 09:24:00	556	12.8245	12.5326
2020-05-31 19:30:00	2020-05-31 09:30:00	557	12.8252	12.1996
2020-05-31 19:36:00	2020-05-31 09:36:00	558	12.8239	12.6502
2020-05-31 19:42:00	2020-05-31 09:42:00	559	12.8268	12.2271
2020-05-31 19:48:00	2020-05-31 09:48:00	560	12.8224	12.919
2020-05-31 19:54:00	2020-05-31 09:54:00	561	12.8237	12.6726
2020-05-31 20:00:00	2020-05-31 10:00:00	562	12.8242	12.6532
2020-05-31 20:06:00	2020-05-31 10:06:00	563	12.823	12.1496
2020-05-31 20:12:00	2020-05-31 10:12:00	564	12.824	12.335
2020-05-31 20:18:00	2020-05-31 10:18:00	565	12.8233	12.7678
2020-05-31 20:24:00	2020-05-31 10:24:00	566	12.8222	12.6714
2020-05-31 20:30:00	2020-05-31 10:30:00	567	12.8205	11.9565
2020-05-31 20:36:00	2020-05-31 10:36:00	568	12.8236	12.5065
2020-05-31 20:42:00	2020-05-31 10:42:00	569	12.8203	12.3956
2020-05-31 20:48:00	2020-05-31 10:48:00	570	12.8225	12.7393
2020-05-31 20:54:00	2020-05-31 10:54:00	571	12.8218	12.2955
2020-05-31 21:00:00	2020-05-31 11:00:00	572	12.8215	12.907
2020-05-31 21:06:00	2020-05-31 11:06:00	573	12.8196	12.2882
2020-05-31 21:12:00	2020-05-31 11:12:00	574	12.82	12.3376
2020-05-31 21:18:00	2020-05-31 11:18:00	575	12.82	12.896
2020-05-31 21:24:00	2020-05-31 11:24:00	576	12.8217	12.0116
2020-05-31 21:30:00	2020-05-31 11:30:00	577	12.8201	12.606
2020-05-31 21:36:00	2020-05-31 11:36:00	578	12.8192	11.9269
2020-05-31 21:42:00	2020-05-31 11:42:00	579	12.8175	12.1123
2020-05-31 21:48:00	2020-05-31 11:48:00	580	12.8204	11.9335
2020-05-31 21:54:00	2020-05-31 11:54:00	581	12.8181	12.4152
2020-05-31 22:00:00	2020-05-31 12:00:00	582	12.8187	12.6712
2020-05-31 22:06:00	2020-05-31 12:06:00	583	12.8187	12.7481
2020-05-31 22:12:00	2020-05-31 12:12:00	584	12.818	12.2928
2020-05-31 22:18:00	2020-05-31 12:18:00	585	12.8195	11.8759
2020-05-31 22:24:00	2020-05-31 12:24:00	586	12.8161	12.1189
2020-05-31 22:30:00	2020-05-31 12:30:00	587	12.818	12.5415
2020-05-31 22:36:00	2020-05-31 12:36:00	588	12.8164	11.9194
2020-05-31 22:42:00	2020-05-31 12:42:00	589	12.8175	12.1189
2020-05-31 22:48:00	2020-05-31 12:48:00	590	12.8177	12.2792
2020-05-31 22:54:00	2020-05-31 12:54:00	591	12.8162	12.2589
2020-05-31 23:00:00	2020-05-31 13:00:00	592	12.8156	11.7271
2020-05-31 23:06:00	2020-05-31 13:06:00	593	12.8167	12.0804
2020-05-31 23:12:00	2020-05-31 13:12:00	594	12.8163	12.9685
2020-05-31 23:18:00	2020-05-31 13:18:00	595	12.8172	12.2294
2020-05-31 23:24:00	2020-05-31 13:24:00	596	12.8147	12.2825
2020-05-31 23:30:00	2020-05-31 13:30:00	597	12.8152	12.2208
2020-05-31 23:36:00	2020-05-31 13:36:00	598	12.8172	11.9784
2020-05-31 23:42:00	2020-05-31 13:42:00	599	12.8155	12.7312
2020-05-31 23:48:00	2020-05-31 13:48:00	600	12.8152	12.0122
2020-05-31 23:54:00	2020-05-31 13:54:00	601	12.8168	12.335
2020-06-01	2020-05-31 14:00:00	602	12.816	12.4514
2020-06-01 00:06:00	2020-05-31 14:06:00	603	12.8142	11.8146
2020-06-01 00:12:00	2020-05-31 14:12:00	604	12.814	11.9375
2020-06-01 00:18:00	2020-05-31 14:18:00	605	12.8151	12.5265
2020-06-01 00:24:00	2020-05-31 14:24:00	606	12.8173	12.3049
2020-06-01 00:30:00	2020-05-31 14:30:00	607	12.8151	12.2774
2020-06-01 00:36:00	2020-05-31 14:36:00	608	12.8143	12.0517
2020-06-01 00:42:00	2020-05-31 14:42:00	609	12.8139	11.9693
2020-06-01 00:48:00	2020-05-31 14:48:00	610	12.8147	12.5828
2020-06-01 00:54:00	2020-05-31 14:54:00	611	12.8157	12.4263
2020-06-01 01:00:00	2020-05-31 15:00:00	612	12.8159	12.7027
2020-06-01 01:06:00	2020-05-31 15:06:00	613	12.8158	11.5407
2020-06-01 01:12:00	2020-05-31 15:12:00	614	12.8137	12.8767
2020-06-01 01:18:00	2020-05-31 15:18:00	615	12.8142	12.8946
2020-06-01 01:24:00	2020-05-31 15:24:00	616	12.8128	11.9668
2020-06-01 01:30:00	2020-05-31 15:30:00	617	12.8161	11.5971
2020-06-01 01:36:00	2020-05-31 15:36:00	618	12.8155	12.1675
2020-06-01 01:42:00	2020-05-31 15:42:00	619	12.8163	12.0708
2020-06-01 01:48:00	2020-05-31 15:48:00	620	12.8127	12.2851
2020-06-01 01:54:00	2020-05-31 15:54:00	621	12.8136	13.2823
2020-06-01 02:00:00	2020-05-31 16:00:00	622	12.8125	11.7835
2020-06-01 02:06:00	2020-05-31 16:06:00	623	12.8133	11.777
2020-06-01 02:12:00	2020-05-31 16:12:00	624	12.8138	11.4613
2020-06-01 02:18:00	2020-05-31 16:18:00	625	12.8139	12.7896
2020-06-01 02:24:00	2020-05-31 16:24:00	626	12.8122	11.4666
2020-06-01 02:30:00	2020-05-31 16:30:00	627	12.8123	12.6813
2020-06-01 02:36:00	2020-05-31 16:36:00	628	12.8115	12.3547
2020-06-01 02:42:00	2020-05-31 16:42:00	629	12.8119	12.5238
2020-06-01 02:48:00	2020-05-31 16:48:00	630	12.8092	11.5731
2020-06-01 02:54:00	2020-05-31 16:54:00	631	12.8106	11.788
2020-06-01 03:00:00	2020-05-31 17:00:00	632	12.8108	12.0698
2020-06-01 03:06:00	2020-05-31 17:06:00	633	12.8117	11.5873
2020-06-01 03:12:00	2020-05-31 17:12:00	634	12.8079	11.732
2020-06-01 03:18:00	2020-05-31 17:18:00	635	12.8092	12.7251
2020-06-01 03:24:00	2020-05-31 17:24:00	636	12.8112	12.4866
2020-06-01 03:30:00	2020-05-31 17:30:00	637	12.809	12.069
2020-06-01 03:36:00	2020-05-31 17:36:00	638	12.8098	12.1701
2020-06-01 03:42:00	2020-05-31 17:42:00	639	12.8097	11.6842
2020-06-01 03:48:00	2020-05-31 17:48:00	640	12.8091	11.6644
2020-06-01 03:54:00	2020-05-31 17:54:00	641	12.8096	11.7039
2020-06-01 04:00:00	2020-05-31 18:00:00	642	12.8094	12.1449
2020-06-01 04:06:00	2020-05-31 18:06:00	643	12.8105	12.6502
2020-06-01 04:12:00	2020-05-31 18:12:00	644	12.81	12.4738
2020-06-01 04:18:00	2020-05-31 18:18:00	645	12.8077	12.2236
2020-06-01 04:24:00	2020-05-31 18:24:00	646	12.8103	11.9025
2020-06-01 04:30:00	2020-05-31 18:30:00	647	12.811	12.2308
2020-06-01 04:36:00	2020-05-31 18:36:00	648	12.8083	12.977
2020-06-01 04:42:00	2020-05-31 18:42:00	649	12.8108	11.4847
2020-06-01 04:48:00	2020-05-31 18:48:00	650	12.8097	11.6899
2020-06-01 04:54:00	2020-05-31 18:54:00	651	12.8087	11.2287
2020-06-01 05:00:00	2020-05-31 19:00:00	652	12.8097	12.7599
2020-06-01 05:06:00	2020-05-31 19:06:00	653	12.8091	11.6624
2020-06-01 05:12:00	2020-05-31 19:12:00	654	12.8093	11.9705
2020-06-01 05:18:00	2020-05-31 19:18:00	655	12.8075	12.119
2020-06-01 05:24:00	2020-05-31 19:24:00	656	12.8087	13.5501
2020-06-01 05:30:00	2020-05-31 19:30:00	657	12.8083	14.0301
2020-06-01 05:36:00	2020-05-31 19:36:00	658	12.8088	13.2377
2020-06-01 05:42:00	2020-05-31 19:42:00	659	12.8082	13.0417
2020-06-01 05:48:00	2020-05-31 19:48:00	660	12.8057	13.1093
2020-06-01 05:54:00	2020-05-31 19:54:00	661	12.8079	12.9278
2020-06-01 06:00:00	2020-05-31 20:00:00	662	12.8075	13.3826
2020-06-01 06:06:00	2020-05-31 20:06:00	663	12.8071	13.7882
2020-06-01 06:12:00	2020-05-31 20:12:00	664	12.8068	14.4337
2020-06-01 06:18:00	2020-05-31 20:18:00	665	12.8075	13.0899
2020-06-01 06:24:00	2020-05-31 20:24:00	666	12.8094	14.8301
2020-06-01 06:30:00	2020-05-31 20:30:00	667	12.8051	14.4119
2020-06-01 06:36:00	2020-05-31 20:36:00	668	12.8055	14.7949
2020-06-01 06:42:00	2020-05-31 20:42:00	669	12.8091	16.0824
2020-06-01 06:48:00	2020-05-31 20:48:00	670	12.8089	18.1111
2020-06-01 06:54:00	2020-05-31 20:54:00	671	12.807	27.1579
2020-06-01 07:00:00	2020-05-31 21:00:00	672	12.8056	21.1237
2020-06-01 07:06:00	2020-05-31 21:06:00	673	12.8073	21.0521
2020-06-01 07:12:00	2020-05-31 21:12:00	674	12.8063	20.9685
2020-06-01 07:18:00	2020-05-31 21:18:00	675	12.8069	22.9774
2020-06-01 07:24:00	2020-05-31 21:24:00	676	12.806	24.6681
2020-06-01 07:30:00	2020-05-31 21:30:00	677	12.8086	25.4888
2020-06-01 07:36:00	2020-05-31 21:36:00	678	12.8067	25.5344
2020-06-01 07:42:00	2020-05-31 21:42:00	679	12.8063	26.81
2020-06-01 07:48:00	2020-05-31 21:48:00	680	12.8065	27.4117
2020-06-01 07:54:00	2020-05-31 21:54:00	681	12.8065	27.0877
2020-06-01 08:00:00	2020-05-31 22:00:00	682	12.8065	26.9148
2020-06-01 08:06:00	2020-05-31 22:06:00	683	12.805	25.6105
2020-06-01 08:12:00	2020-05-31 22:12:00	684	12.8054	27.5397
2020-06-01 08:18:00	2020-05-31 22:18:00	685	12.8057	27.2841
2020-06-01 08:24:00	2020-05-31 22:24:00	686	12.807	31.8795
2020-06-01 08:30:00	2020-05-31 22:30:00	687	12.8051	30.789
2020-06-01 08:36:00	2020-05-31 22:36:00	688	12.8071	29.0704
2020-06-01 08:42:00	2020-05-31 22:42:00	689	12.805	33.2139
2020-06-01 08:48:00	2020-05-31 22:48:00	690	12.8056	33.3848
2020-06-01 08:54:00	2020-05-31 22:54:00	691	12.8047	35.8275
2020-06-01 09:00:00	2020-05-31 23:00:00	692	12.8042	69.5226
2020-06-01 09:06:00	2020-05-31 23:06:00	693	12.8044	43.2621
2020-06-01 09:12:00	2020-05-31 23:12:00	694	12.8046	48.6331
2020-06-01 09:18:00	2020-05-31 23:18:00	695	12.8043	69.1804
2020-06-01 09:24:00	2020-05-31 23:24:00	696	12.8044	49.315
2020-06-01 09:30:00	2020-05-31 23:30:00	697	12.8042	81.7852
2020-06-01 09:36:00	2020-05-31 23:36:00	698	12.8019	NAN
2020-06-01 09:42:00	2020-05-31 23:42:00	699	12.8041	45.5533
2020-06-01 09:48:00	2020-05-31 23:48:00	700	12.804	46.6132
2020-06-01 09:54:00	2020-05-31 23:54:00	701	12.8054	36.6826
2020-06-01 10:00:00	2020-06-01	702	12.8022	38.1968
2020-06-01 10:06:00	2020-06-01 00:06:00	703	12.8044	NAN
2020-06-01 10:12:00	2020-06-01 00:12:00	704	12.8029	34.3553
2020-06-01 10:18:00	2020-06-01 00:18:00	705	12.8034	47.6726
2020-06-01 10:24:00	2020-06-01 00:24:00	706	12.8026	38.7658
2020-06-01 10:30:00	2020-06-01 00:30:00	707	12.8017	31.814
2020-06-01 10:36:00	2020-06-01 00:36:00	708	12.8012	30.7819
2020-06-01 10:42:00	2020-06-01 00:42:00	709	12.8032	44.2939
2020-06-01 10:48:00	2020-06-01 00:48:00	710	12.7999	64.196
2020-06-01 10:54:00	2020-06-01 00:54:00	711	12.8032	33.3236
2020-06-01 11:00:00	2020-06-01 01:00:00	712	12.8023	37.2141
2020-06-01 11:06:00	2020-06-01 01:06:00	713	12.8038	32.7747
2020-06-01 11:12:00	2020-06-01 01:12:00	714	12.803	33.4845
2020-06-01 11:18:00	2020-06-01 01:18:00	715	12.8005	46.629
2020-06-01 11:24:00	2020-06-01 01:24:00	716	12.8024	38.1038
2020-06-01 11:30:00	2020-06-01 01:30:00	717	12.8018	66.5525
2020-06-01 11:36:00	2020-06-01 01:36:00	718	12.8031	40.8372
2020-06-01 11:42:00	2020-06-01 01:42:00	719	12.8036	33.2225
2020-06-01 11:48:00	2020-06-01 01:48:00	720	12.8042	35.0344
2020-06-01 11:54:00	2020-06-01 01:54:00	721	12.8007	51.173
2020-06-01 12:00:00	2020-06-01 02:00:00	722	12.8003	49.9998
2020-06-01 12:06:00	2020-06-01 02:06:00	723	12.8033	32.1166
2020-06-01 12:12:00	2020-06-01 02:12:00	724	12.8038	33.8924
2020-06-01 12:18:00	2020-06-01 02:18:00	725	12.7995	33.5804
2020-06-01 12:24:00	2020-06-01 02:24:00	726	12.8027	33.1551
2020-06-01 12:30:00	2020-06-01 02:30:00	727	12.803	34.3653
2020-06-01 12:36:00	2020-06-01 02:36:00	728	12.8034	33.7605
2020-06-01 12:42:00	2020-06-01 02:42:00	729	12.8013	35.8529
2020-06-01 12:48:00	2020-06-01 02:48:00	730	12.8013	34.0082
2020-06-01 12:54:00	2020-06-01 02:54:00	731	12.8031	34.8344
2020-06-01 13:00:00	2020-06-01 03:00:00	732	12.8018	32.2906
2020-06-01 13:06:00	2020-06-01 03:06:00	733	12.803	31.9221
2020-06-01 13:12:00	2020-06-01 03:12:00	734	12.8038	41.0938
2020-06-01 13:18:00	2020-06-01 03:18:00	735	12.8031	32.2121
2020-06-01 13:24:00	2020-06-01 03:24:00	736	12.8019	33.0588
2020-06-01 13:30:00	2020-06-01 03:30:00	737	12.802	34.0393
2020-06-01 13:36:00	2020-06-01 03:36:00	738	12.7991	34.2349
2020-06-01 13:42:00	2020-06-01 03:42:00	739	12.8014	35.2827
2020-06-01 13:48:00	2020-06-01 03:48:00	740	12.8026	34.0845
2020-06-01 13:54:00	2020-06-01 03:54:00	741	12.8028	33.5887
2020-06-01 14:00:00	2020-06-01 04:00:00	742	12.8025	34.929
2020-06-01 14:06:00	2020-06-01 04:06:00	743	12.8033	33.6325
2020-06-01 14:12:00	2020-06-01 04:12:00	744	12.8005	NAN
2020-06-01 14:18:00	2020-06-01 04:18:00	745	12.804	36.3899
2020-06-01 14:24:00	2020-06-01 04:24:00	746	12.8033	40.4954
2020-06-01 14:30:00	2020-06-01 04:30:00	747	12.8049	54.9956
2020-06-01 14:36:00	2020-06-01 04:36:00	748	12.8017	34.941
2020-06-01 14:42:00	2020-06-01 04:42:00	749	12.8043	61.649
2020-06-01 14:48:00	2020-06-01 04:48:00	750	12.8033	42.1746
2020-06-01 14:54:00	2020-06-01 04:54:00	751	12.8018	37.7518
2020-06-01 15:00:00	2020-06-01 05:00:00	752	12.8025	41.3849
2020-06-01 15:06:00	2020-06-01 05:06:00	753	12.8025	40.9046
2020-06-01 15:12:00	2020-06-01 05:12:00	754	12.8032	79.5367
2020-06-01 15:18:00	2020-06-01 05:18:00	755	12.8051	60.4213
2020-06-01 15:24:00	2020-06-01 05:24:00	756	12.8021	NAN
2020-06-01 15:30:00	2020-06-01 05:30:00	757	12.8044	115.071
2020-06-01 15:36:00	2020-06-01 05:36:00	758	12.8028	86.8057
2020-06-01 15:42:00	2020-06-01 05:42:00	759	12.8029	71.4911
2020-06-01 15:48:00	2020-06-01 05:48:00	760	12.8017	68.182
2020-06-01 15:54:00	2020-06-01 05:54:00	761	12.8011	70.9262
2020-06-01 16:00:00	2020-06-01 06:00:00	762	12.801	95.4856
2020-06-01 16:06:00	2020-06-01 06:06:00	763	12.8022	74.4864
2020-06-01 16:12:00	2020-06-01 06:12:00	764	12.8007	77.763
2020-06-01 16:18:00	2020-06-01 06:18:00	765	12.8028	NAN
2020-06-01 16:24:00	2020-06-01 06:24:00	766	12.804	95.4667
2020-06-01 16:30:00	2020-06-01 06:30:00	767	12.8026	106.992
2020-06-01 16:36:00	2020-06-01 06:36:00	768	12.8042	110.86
2020-06-01 16:42:00	2020-06-01 06:42:00	769	12.8006	96.7013
2020-06-01 16:48:00	2020-06-01 06:48:00	770	12.8027	101.445
2020-06-01 16:54:00	2020-06-01 06:54:00	771	12.8005	84.4543
2020-06-01 17:00:00	2020-06-01 07:00:00	772	12.8014	79.6618
2020-06-01 17:06:00	2020-06-01 07:06:00	773	12.8031	77.9663
2020-06-01 17:12:00	2020-06-01 07:12:00	774	12.8033	77.5147
2020-06-01 17:18:00	2020-06-01 07:18:00	775	12.8019	NAN
2020-06-01 17:24:00	2020-06-01 07:24:00	776	12.803	82.7738
2020-06-01 17:30:00	2020-06-01 07:30:00	777	12.8017	84.9492
2020-06-01 17:36:00	2020-06-01 07:36:00	778	12.8038	84.5812
2020-06-01 17:42:00	2020-06-01 07:42:00	779	12.8044	85.2939
2020-06-01 17:48:00	2020-06-01 07:48:00	780	12.8017	87.7345
2020-06-01 17:54:00	2020-06-01 07:54:00	781	12.804	92.308
2020-06-01 18:00:00	2020-06-01 08:00:00	782	12.8024	NAN
2020-06-01 18:06:00	2020-06-01 08:06:00	783	12.8025	90.6264
2020-06-01 18:12:00	2020-06-01 08:12:00	784	12.8009	97.3411
2020-06-01 18:18:00	2020-06-01 08:18:00	785	12.8032	95.0082
2020-06-01 18:24:00	2020-06-01 08:24:00	786	12.8017	94.7322
2020-06-01 18:30:00	2020-06-01 08:30:00	787	12.8022	93.4819
2020-06-01 18:36:00	2020-06-01 08:36:00	788	12.8031	94.5088
2020-06-01 18:42:00	2020-06-01 08:42:00	789	12.8024	96.4199
2020-06-01 18:48:00	2020-06-01 08:48:00	790	12.8028	91.8893
2020-06-01 18:54:00	2020-06-01 08:54:00	791	12.801	98.3116
2020-06-01 19:00:00	2020-06-01 09:00:00	792	12.8021	92.4091
2020-06-01 19:06:00	2020-06-01 09:06:00	793	12.8031	92.5648
2020-06-01 19:12:00	2020-06-01 09:12:00	794	12.8032	98.0666
2020-06-01 19:18:00	2020-06-01 09:18:00	795	12.8027	93.7563
2020-06-01 19:24:00	2020-06-01 09:24:00	796	12.8024	93.9864
2020-06-01 19:30:00	2020-06-01 09:30:00	797	12.8018	94.1838
2020-06-01 19:36:00	2020-06-01 09:36:00	798	12.8009	109.212
2020-06-01 19:42:00	2020-06-01 09:42:00	799	12.8003	107.409
2020-06-01 19:48:00	2020-06-01 09:48:00	800	12.8009	90.2664
2020-06-01 19:54:00	2020-06-01 09:54:00	801	12.8019	90.0328
2020-06-01 20:00:00	2020-06-01 10:00:00	802	12.8012	93.2217
2020-06-01 20:06:00	2020-06-01 10:06:00	803	12.8014	86.1175
2020-06-01 20:12:00	2020-06-01 10:12:00	804	12.8017	89.2213
2020-06-01 20:18:00	2020-06-01 10:18:00	805	12.8002	86.0306
2020-06-01 20:24:00	2020-06-01 10:24:00	806	12.8021	87.4976
2020-06-01 20:30:00	2020-06-01 10:30:00	807	12.8014	87.7943
2020-06-01 20:36:00	2020-06-01 10:36:00	808	12.8012	87.1065
2020-06-01 20:42:00	2020-06-01 10:42:00	809	12.8012	89.2528
2020-06-01 20:48:00	2020-06-01 10:48:00	810	12.8002	85.0312
2020-06-01 20:54:00	2020-06-01 10:54:00	811	12.8001	NAN
2020-06-01 21:00:00	2020-06-01 11:00:00	812	12.8002	88.3959
2020-06-01 21:06:00	2020-06-01 11:06:00	813	12.8011	85.0507
2020-06-01 21:12:00	2020-06-01 11:12:00	814	12.801	87.0892
2020-06-01 21:18:00	2020-06-01 11:18:00	815	12.8005	83.4168
2020-06-01 21:24:00	2020-06-01 11:24:00	816	12.8	83.9404
2020-06-01 21:30:00	2020-06-01 11:30:00	817	12.7998	83.6063
2020-06-01 21:36:00	2020-06-01 11:36:00	818	12.8015	84.5015
2020-06-01 21:42:00	2020-06-01 11:42:00	819	12.7999	98.5133
2020-06-01 21:48:00	2020-06-01 11:48:00	820	12.7993	NAN
2020-06-01 21:54:00	2020-06-01 11:54:00	821	12.8017	81.0127
2020-06-01 22:00:00	2020-06-01 12:00:00	822	12.8019	81.159
2020-06-01 22:06:00	2020-06-01 12:06:00	823	12.7992	83.1537
2020-06-01 22:12:00	2020-06-01 12:12:00	824	12.8004	85.4164
2020-06-01 22:18:00	2020-06-01 12:18:00	825	12.8017	81.0517
2020-06-01 22:24:00	2020-06-01 12:24:00	826	12.8007	82.0011
2020-06-01 22:30:00	2020-06-01 12:30:00	827	12.7993	92.2675
2020-06-01 22:36:00	2020-06-01 12:36:00	828	12.7981	83.442
2020-06-01 22:42:00	2020-06-01 12:42:00	829	12.7988	86.2353
2020-06-01 22:48:00	2020-06-01 12:48:00	830	12.8007	85.8576
2020-06-01 22:54:00	2020-06-01 12:54:00	831	12.7979	85.5798
2020-06-01 23:00:00	2020-06-01 13:00:00	832	12.8012	84.9703
2020-06-01 23:06:00	2020-06-01 13:06:00	833	12.8003	84.1743
2020-06-01 23:12:00	2020-06-01 13:12:00	834	12.7969	84.3434
2020-06-01 23:18:00	2020-06-01 13:18:00	835	12.7981	86.6659
2020-06-01 23:24:00	2020-06-01 13:24:00	836	12.7982	84.8554
2020-06-01 23:30:00	2020-06-01 13:30:00	837	12.8008	86.7516
2020-06-01 23:36:00	2020-06-01 13:36:00	838	12.7967	86.7994
2020-06-01 23:42:00	2020-06-01 13:42:00	839	12.7966	86.0949
2020-06-01 23:48:00	2020-06-01 13:48:00	840	12.7993	85.7058
2020-06-01 23:54:00	2020-06-01 13:54:00	841	12.8001	89.0304
2020-06-02	2020-06-01 14:00:00	842	12.7982	88.7559
2020-06-02 00:06:00	2020-06-01 14:06:00	843	12.7965	87.7247
2020-06-02 00:12:00	2020-06-01 14:12:00	844	12.7988	103.945
2020-06-02 00:18:00	2020-06-01 14:18:00	845	12.7988	88.8841
2020-06-02 00:24:00	2020-06-01 14:24:00	846	12.7995	90.2489
2020-06-02 00:30:00	2020-06-01 14:30:00	847	12.7981	88.1629
2020-06-02 00:36:00	2020-06-01 14:36:00	848	12.7984	90.0558
2020-06-02 00:42:00	2020-06-01 14:42:00	849	12.7974	104.038
2020-06-02 00:48:00	2020-06-01 14:48:00	850	12.7973	93.1273
2020-06-02 00:54:00	2020-06-01 14:54:00	851	12.7953	90.2382
2020-06-02 01:00:00	2020-06-01 15:00:00	852	12.7998	91.6329
2020-06-02 01:06:00	2020-06-01 15:06:00	853	12.797	94.2772
2020-06-02 01:12:00	2020-06-01 15:12:00	854	12.799	NAN
2020-06-02 01:18:00	2020-06-01 15:18:00	855	12.7974	88.8668
2020-06-02 01:24:00	2020-06-01 15:24:00	856	12.7988	96.6102
2020-06-02 01:30:00	2020-06-01 15:30:00	857	12.7975	114.922
2020-06-02 01:36:00	2020-06-01 15:36:00	858	12.7956	90.371
2020-06-02 01:42:00	2020-06-01 15:42:00	859	12.7983	88.3387
2020-06-02 01:48:00	2020-06-01 15:48:00	860	12.7956	88.7811
2020-06-02 01:54:00	2020-06-01 15:54:00	861	12.7982	90.9128
2020-06-02 02:00:00	2020-06-01 16:00:00	862	12.7984	90.0749
2020-06-02 02:06:00	2020-06-01 16:06:00	863	12.7946	NAN
2020-06-02 02:12:00	2020-06-01 16:12:00	864	12.7963	91.7685
2020-06-02 02:18:00	2020-06-01 16:18:00	865	12.7965	97.8651
2020-06-02 02:24:00	2020-06-01 16:24:00	866	12.7971	87.7829
2020-06-02 02:30:00	2020-06-01 16:30:00	867	12.7963	90.8627
2020-06-02 02:36:00	2020-06-01 16:36:00	868	12.797	90.5239
2020-06-02 02:42:00	2020-06-01 16:42:00	869	12.7976	91.7825
2020-06-02 02:48:00	2020-06-01 16:48:00	870	12.7954	88.8206
2020-06-02 02:54:00	2020-06-01 16:54:00	871	12.7956	88.4702
2020-06-02 03:00:00	2020-06-01 17:00:00	872	12.7947	NAN
2020-06-02 03:06:00	2020-06-01 17:06:00	873	12.7946	88.8307
2020-06-02 03:12:00	2020-06-01 17:12:00	874	12.798	88.3623
2020-06-02 03:18:00	2020-06-01 17:18:00	875	12.7969	88.9138
2020-06-02 03:24:00	2020-06-01 17:24:00	876	12.7967	86.6171
2020-06-02 03:30:00	2020-06-01 17:30:00	877	12.7966	87.6557
2020-06-02 03:36:00	2020-06-01 17:36:00	878	12.7934	83.7143
2020-06-02 03:42:00	2020-06-01 17:42:00	879	12.7965	85.8607
2020-06-02 03:48:00	2020-06-01 17:48:00	880	12.7944	84.4852
2020-06-02 03:54:00	2020-06-01 17:54:00	881	12.7958	84.3511
2020-06-02 04:00:00	2020-06-01 18:00:00	882	12.7949	84.404
2020-06-02 04:06:00	2020-06-01 18:06:00	883	12.7947	84.0615
2020-06-02 04:12:00	2020-06-01 18:12:00	884	12.7969	83.0031
2020-06-02 04:18:00	2020-06-01 18:18:00	885	12.7968	84.6777
2020-06-02 04:24:00	2020-06-01 18:24:00	886	12.7954	99.8149
2020-06-02 04:30:00	2020-06-01 18:30:00	887	12.7943	79.0003
2020-06-02 04:36:00	2020-06-01 18:36:00	888	12.7961	79.0367
2020-06-02 04:42:00	2020-06-01 18:42:00	889	12.7951	79.0049
2020-06-02 04:48:00	2020-06-01 18:48:00	890	12.7943	77.8983
2020-06-02 04:54:00	2020-06-01 18:54:00	891	12.7949	77.2274
2020-06-02 05:00:00	2020-06-01 19:00:00	892	12.7952	75.369
2020-06-02 05:06:00	2020-06-01 19:06:00	893	12.7967	77.0263
2020-06-02 05:12:00	2020-06-01 19:12:00	894	12.7954	74.7819
2020-06-02 05:18:00	2020-06-01 19:18:00	895	12.7987	74.9256
2020-06-02 05:24:00	2020-06-01 19:24:00	896	12.7942	74.5727
2020-06-02 05:30:00	2020-06-01 19:30:00	897	12.7965	78.7882
2020-06-02 05:36:00	2020-06-01 19:36:00	898	12.7947	72.7878
2020-06-02 05:42:00	2020-06-01 19:42:00	899	12.7963	72.9475
2020-06-02 05:48:00	2020-06-01 19:48:00	900	12.7936	71.7874
2020-06-02 05:54:00	2020-06-01 19:54:00	901	12.796	79.0292
2020-06-02 06:00:00	2020-06-01 20:00:00	902	12.7958	90.2964
2020-06-02 06:06:00	2020-06-01 20:06:00	903	12.7944	80.9695
2020-06-02 06:12:00	2020-06-01 20:12:00	904	12.7949	67.9044
2020-06-02 06:18:00	2020-06-01 20:18:00	905	12.7927	69.1567
2020-06-02 06:24:00	2020-06-01 20:24:00	906	12.7924	68.1828
2020-06-02 06:30:00	2020-06-01 20:30:00	907	12.7965	66.6099
2020-06-02 06:36:00	2020-06-01 20:36:00	908	12.7949	66.159
2020-06-02 06:42:00	2020-06-01 20:42:00	909	12.794	66.0055
2020-06-02 06:48:00	2020-06-01 20:48:00	910	12.7944	65.521
2020-06-02 06:54:00	2020-06-01 20:54:00	911	12.7955	65.2442
2020-06-02 07:00:00	2020-06-01 21:00:00	912	12.794	65.2919
2020-06-02 07:06:00	2020-06-01 21:06:00	913	12.7931	63.744
2020-06-02 07:12:00	2020-06-01 21:12:00	914	12.7944	64.0936
2020-06-02 07:18:00	2020-06-01 21:18:00	915	12.793	62.7951
2020-06-02 07:24:00	2020-06-01 21:24:00	916	12.7957	63.0444
2020-06-02 07:30:00	2020-06-01 21:30:00	917	12.7954	62.0743
2020-06-02 07:36:00	2020-06-01 21:36:00	918	12.7944	63.8427
2020-06-02 07:42:00	2020-06-01 21:42:00	919	12.7917	65.9583
2020-06-02 07:48:00	2020-06-01 21:48:00	920	12.7934	NAN
2020-06-02 07:54:00	2020-06-01 21:54:00	921	12.794	68.5401
2020-06-02 08:00:00	2020-06-01 22:00:00	922	12.792	65.8144
2020-06-02 08:06:00	2020-06-01 22:06:00	923	12.7934	68.9899
2020-06-02 08:12:00	2020-06-01 22:12:00	924	12.7954	68.6223
2020-06-02 08:18:00	2020-06-01 22:18:00	925	12.7953	63.6576
2020-06-02 08:24:00	2020-06-01 22:24:00	926	12.7897	64.6236
2020-06-02 08:30:00	2020-06-01 22:30:00	927	12.7956	58.334
2020-06-02 08:36:00	2020-06-01 22:36:00	928	12.7935	59.1482
2020-06-02 08:42:00	2020-06-01 22:42:00	929	12.7942	71.7278
2020-06-02 08:48:00	2020-06-01 22:48:00	930	12.7962	58.5308
2020-06-02 08:54:00	2020-06-01 22:54:00	931	12.7941	57.627
2020-06-02 09:00:00	2020-06-01 23:00:00	932	12.7951	66.2809
2020-06-02 09:06:00	2020-06-01 23:06:00	933	12.7909	58.0183
2020-06-02 09:12:00	2020-06-01 23:12:00	934	12.7907	72.94
2020-06-02 09:18:00	2020-06-01 23:18:00	935	12.794	56.0432
2020-06-02 09:24:00	2020-06-01 23:24:00	936	12.7924	54.3871
2020-06-02 09:30:00	2020-06-01 23:30:00	937	12.7931	59.8201
2020-06-02 09:36:00	2020-06-01 23:36:00	938	12.7912	54.7805
2020-06-02 09:42:00	2020-06-01 23:42:00	939	12.7926	54.8421
2020-06-02 09:48:00	2020-06-01 23:48:00	940	12.792	65.1594
2020-06-02 09:54:00	2020-06-01 23:54:00	941	12.7928	NAN
2020-06-02 10:00:00	2020-06-02	942	12.794	57.4406
2020-06-02 10:06:00	2020-06-02 00:06:00	943	12.7942	84.3855
2020-06-02 10:12:00	2020-06-02 00:12:00	944	12.7956	65.8273
2020-06-02 10:18:00	2020-06-02 00:18:00	945	12.7934	NAN
2020-06-02 10:24:00	2020-06-02 00:24:00	946	12.7933	54.5228
2020-06-02 10:30:00	2020-06-02 00:30:00	947	12.7929	59.7558
2020-06-02 10:36:00	2020-06-02 00:36:00	948	12.7943	58.2349
2020-06-02 10:42:00	2020-06-02 00:42:00	949	12.7947	NAN
2020-06-02 10:48:00	2020-06-02 00:48:00	950	12.7954	NAN
2020-06-02 10:54:00	2020-06-02 00:54:00	951	12.7946	52.0008
2020-06-02 11:00:00	2020-06-02 01:00:00	952	12.7947	57.4903
2020-06-02 11:06:00	2020-06-02 01:06:00	953	12.7951	NAN
2020-06-02 11:12:00	2020-06-02 01:12:00	954	12.7965	53.5173
2020-06-02 11:18:00	2020-06-02 01:18:00	955	12.7967	52.4593
2020-06-02 11:24:00	2020-06-02 01:24:00	956	12.7945	NAN
2020-06-02 11:30:00	2020-06-02 01:30:00	957	12.7953	56.0568
2020-06-02 11:36:00	2020-06-02 01:36:00	958	12.7944	81.5833
2020-06-02 11:42:00	2020-06-02 01:42:00	959	12.7972	102.302
2020-06-02 11:48:00	2020-06-02 01:48:00	960	12.7968	52.809
2020-06-02 11:54:00	2020-06-02 01:54:00	961	12.7954	60.2892
2020-06-02 12:00:00	2020-06-02 02:00:00	962	12.7973	68.3838
2020-06-02 12:06:00	2020-06-02 02:06:00	963	12.7961	52.0851
2020-06-02 12:12:00	2020-06-02 02:12:00	964	12.7952	51.8684
2020-06-02 12:18:00	2020-06-02 02:18:00	965	12.7937	52.5222
2020-06-02 12:24:00	2020-06-02 02:24:00	966	12.7969	50.2784
2020-06-02 12:30:00	2020-06-02 02:30:00	967	12.7968	52.0369
2020-06-02 12:36:00	2020-06-02 02:36:00	968	12.7974	51.0861
2020-06-02 12:42:00	2020-06-02 02:42:00	969	12.7999	51.0493
2020-06-02 12:48:00	2020-06-02 02:48:00	970	12.7996	51.7743
2020-06-02 12:54:00	2020-06-02 02:54:00	971	12.7998	49.5491
2020-06-02 13:00:00	2020-06-02 03:00:00	972	12.7984	80.8128
2020-06-02 13:06:00	2020-06-02 03:06:00	973	12.7975	49.8614
2020-06-02 13:12:00	2020-06-02 03:12:00	974	12.8	51.2595
2020-06-02 13:18:00	2020-06-02 03:18:00	975	12.8017	50.5723
2020-06-02 13:24:00	2020-06-02 03:24:00	976	12.7977	59.3651
2020-06-02 13:30:00	2020-06-02 03:30:00	977	12.7996	58.8226
2020-06-02 13:36:00	2020-06-02 03:36:00	978	12.801	51.5216
2020-06-02 13:42:00	2020-06-02 03:42:00	979	12.7983	51.0434
2020-06-02 13:48:00	2020-06-02 03:48:00	980	12.8001	50.1028
2020-06-02 13:54:00	2020-06-02 03:54:00	981	12.8016	52.033
2020-06-02 14:00:00	2020-06-02 04:00:00	982	12.8007	52.8275
2020-06-02 14:06:00	2020-06-02 04:06:00	983	12.802	53.0403
2020-06-02 14:12:00	2020-06-02 04:12:00	984	12.8005	51.6148
2020-06-02 14:18:00	2020-06-02 04:18:00	985	12.8007	NAN
2020-06-02 14:24:00	2020-06-02 04:24:00	986	12.8004	62.5703
2020-06-02 14:30:00	2020-06-02 04:30:00	987	12.8031	53.9003
2020-06-02 14:36:00	2020-06-02 04:36:00	988	12.8021	56.7446
2020-06-02 14:42:00	2020-06-02 04:42:00	989	12.8011	75.3252
2020-06-02 14:48:00	2020-06-02 04:48:00	990	12.8027	48.0635
2020-06-02 14:54:00	2020-06-02 04:54:00	991	12.8031	54.1773
2020-06-02 15:00:00	2020-06-02 05:00:00	992	12.8022	93.5916
2020-06-02 15:06:00	2020-06-02 05:06:00	993	12.8039	NAN
2020-06-02 15:12:00	2020-06-02 05:12:00	994	12.8009	54.9201
2020-06-02 15:18:00	2020-06-02 05:18:00	995	12.8021	53.1759
2020-06-02 15:24:00	2020-06-02 05:24:00	996	12.8031	49.4577
2020-06-02 15:30:00	2020-06-02 05:30:00	997	12.8042	77.7756
2020-06-02 15:36:00	2020-06-02 05:36:00	998	12.8024	51.3348
2020-06-02 15:42:00	2020-06-02 05:42:00	999	12.8042	48.6358
2020-06-02 15:48:00	2020-06-02 05:48:00	1000	12.8028	48.8177
2020-06-02 15:54:00	2020-06-02 05:54:00	1001	12.8013	NAN
2020-06-02 16:00:00	2020-06-02 06:00:00	1002	12.8046	75.9616
2020-06-02 16:06:00	2020-06-02 06:06:00	1003	12.8051	49.7188
2020-06-02 16:12:00	2020-06-02 06:12:00	1004	12.8068	52.5206
2020-06-02 16:18:00	2020-06-02 06:18:00	1005	12.8035	58.4435
2020-06-02 16:24:00	2020-06-02 06:24:00	1006	12.804	89.7025
2020-06-02 16:30:00	2020-06-02 06:30:00	1007	12.8054	50.8657
2020-06-02 16:36:00	2020-06-02 06:36:00	1008	12.8041	47.6878
2020-06-02 16:42:00	2020-06-02 06:42:00	1009	12.8028	48.3409
2020-06-02 16:48:00	2020-06-02 06:48:00	1010	12.8054	50.0941
2020-06-02 16:54:00	2020-06-02 06:54:00	1011	12.8065	61.5043
2020-06-02 17:00:00	2020-06-02 07:00:00	1012	12.8054	50.0533
2020-06-02 17:06:00	2020-06-02 07:06:00	1013	12.8034	45.9868
2020-06-02 17:12:00	2020-06-02 07:12:00	1014	12.8078	47.0332
2020-06-02 17:18:00	2020-06-02 07:18:00	1015	12.8044	48.9135
2020-06-02 17:24:00	2020-06-02 07:24:00	1016	12.8072	47.4129
2020-06-02 17:30:00	2020-06-02 07:30:00	1017	12.8041	51.2092
2020-06-02 17:36:00	2020-06-02 07:36:00	1018	12.8072	71.4359
2020-06-02 17:42:00	2020-06-02 07:42:00	1019	12.8065	63.1759
2020-06-02 17:48:00	2020-06-02 07:48:00	1020	12.8051	48.4341
2020-06-02 17:54:00	2020-06-02 07:54:00	1021	12.8039	49.8128
2020-06-02 18:00:00	2020-06-02 08:00:00	1022	12.8062	55.5122
2020-06-02 18:06:00	2020-06-02 08:06:00	1023	12.8047	49.1539
2020-06-02 18:12:00	2020-06-02 08:12:00	1024	12.805	46.1048
2020-06-02 18:18:00	2020-06-02 08:18:00	1025	12.8042	44.8625
2020-06-02 18:24:00	2020-06-02 08:24:00	1026	12.8054	44.7599
2020-06-02 18:30:00	2020-06-02 08:30:00	1027	12.803	44.1244
2020-06-02 18:36:00	2020-06-02 08:36:00	1028	12.8052	46.5338
2020-06-02 18:42:00	2020-06-02 08:42:00	1029	12.8033	45.0751
2020-06-02 18:48:00	2020-06-02 08:48:00	1030	12.8054	44.8201
2020-06-02 18:54:00	2020-06-02 08:54:00	1031	12.8044	43.8665
2020-06-02 19:00:00	2020-06-02 09:00:00	1032	12.8038	44.6913
2020-06-02 19:06:00	2020-06-02 09:06:00	1033	12.8044	46.0934
2020-06-02 19:12:00	2020-06-02 09:12:00	1034	12.8045	44.6913
2020-06-02 19:18:00	2020-06-02 09:18:00	1035	12.8028	45.4502
2020-06-02 19:24:00	2020-06-02 09:24:00	1036	12.8048	45.3914
2020-06-02 19:30:00	2020-06-02 09:30:00	1037	12.8041	44.9374
2020-06-02 19:36:00	2020-06-02 09:36:00	1038	12.8054	44.2737
2020-06-02 19:42:00	2020-06-02 09:42:00	1039	12.8054	45.1413
2020-06-02 19:48:00	2020-06-02 09:48:00	1040	12.8047	44.2996
2020-06-02 19:54:00	2020-06-02 09:54:00	1041	12.8044	45.2408
2020-06-02 20:00:00	2020-06-02 10:00:00	1042	12.8063	45.4693
2020-06-02 20:06:00	2020-06-02 10:06:00	1043	12.8053	44.8034
2020-06-02 20:12:00	2020-06-02 10:12:00	1044	12.8051	44.4819
2020-06-02 20:18:00	2020-06-02 10:18:00	1045	12.8055	44.3867
2020-06-02 20:24:00	2020-06-02 10:24:00	1046	12.8063	45.1934
2020-06-02 20:30:00	2020-06-02 10:30:00	1047	12.808	44.5584
2020-06-02 20:36:00	2020-06-02 10:36:00	1048	12.8068	43.8889
2020-06-02 20:42:00	2020-06-02 10:42:00	1049	12.8055	44.0192
2020-06-02 20:48:00	2020-06-02 10:48:00	1050	12.8054	43.8197
2020-06-02 20:54:00	2020-06-02 10:54:00	1051	12.8044	46.3352
2020-06-02 21:00:00	2020-06-02 11:00:00	1052	12.8047	44.1687
2020-06-02 21:06:00	2020-06-02 11:06:00	1053	12.8047	46.08
2020-06-02 21:12:00	2020-06-02 11:12:00	1054	12.8053	47.0143
2020-06-02 21:18:00	2020-06-02 11:18:00	1055	12.8062	44.1531
2020-06-02 21:24:00	2020-06-02 11:24:00	1056	12.8027	44.9286
2020-06-02 21:30:00	2020-06-02 11:30:00	1057	12.8052	43.8258
2020-06-02 21:36:00	2020-06-02 11:36:00	1058	12.8049	42.7373
2020-06-02 21:42:00	2020-06-02 11:42:00	1059	12.8051	43.5202
2020-06-02 21:48:00	2020-06-02 11:48:00	1060	12.8018	43.9325
2020-06-02 21:54:00	2020-06-02 11:54:00	1061	12.8074	44.2151
2020-06-02 22:00:00	2020-06-02 12:00:00	1062	12.8064	43.6417
2020-06-02 22:06:00	2020-06-02 12:06:00	1063	12.807	45.1844
2020-06-02 22:12:00	2020-06-02 12:12:00	1064	12.8029	44.3535
2020-06-02 22:18:00	2020-06-02 12:18:00	1065	12.8037	44.7241
2020-06-02 22:24:00	2020-06-02 12:24:00	1066	12.8046	51.5786
2020-06-02 22:30:00	2020-06-02 12:30:00	1067	12.8052	44.2687
2020-06-02 22:36:00	2020-06-02 12:36:00	1068	12.8045	51.2023
2020-06-02 22:42:00	2020-06-02 12:42:00	1069	12.804	47.2988
2020-06-02 22:48:00	2020-06-02 12:48:00	1070	12.8017	44.114
2020-06-02 22:54:00	2020-06-02 12:54:00	1071	12.8029	NAN
2020-06-02 23:00:00	2020-06-02 13:00:00	1072	12.8028	43.417
2020-06-02 23:06:00	2020-06-02 13:06:00	1073	12.8019	43.2859
2020-06-02 23:12:00	2020-06-02 13:12:00	1074	12.8046	43.9536
2020-06-02 23:18:00	2020-06-02 13:18:00	1075	12.8043	44.0342
2020-06-02 23:24:00	2020-06-02 13:24:00	1076	12.8013	42.9111
2020-06-02 23:30:00	2020-06-02 13:30:00	1077	12.8028	43.7945
2020-06-02 23:36:00	2020-06-02 13:36:00	1078	12.8038	42.4229
2020-06-02 23:42:00	2020-06-02 13:42:00	1079	12.8046	43.2037
2020-06-02 23:48:00	2020-06-02 13:48:00	1080	12.8011	42.8417
2020-06-02 23:54:00	2020-06-02 13:54:00	1081	12.8028	42.2298
2020-06-03	2020-06-02 14:00:00	1082	12.8032	43.1213
2020-06-03 00:06:00	2020-06-02 14:06:00	1083	12.8044	42.484
2020-06-03 00:12:00	2020-06-02 14:12:00	1084	12.8027	43.2412
2020-06-03 00:18:00	2020-06-02 14:18:00	1085	12.8015	43.101
2020-06-03 00:24:00	2020-06-02 14:24:00	1086	12.8029	42.1087
2020-06-03 00:30:00	2020-06-02 14:30:00	1087	12.801	43.0281
2020-06-03 00:36:00	2020-06-02 14:36:00	1088	12.8012	42.5985
2020-06-03 00:42:00	2020-06-02 14:42:00	1089	12.8037	43.8586
2020-06-03 00:48:00	2020-06-02 14:48:00	1090	12.8031	42.5883
2020-06-03 00:54:00	2020-06-02 14:54:00	1091	12.8014	43.4011
2020-06-03 01:00:00	2020-06-02 15:00:00	1092	12.8026	41.7969
2020-06-03 01:06:00	2020-06-02 15:06:00	1093	12.8024	42.8144
2020-06-03 01:12:00	2020-06-02 15:12:00	1094	12.8033	42.7603
2020-06-03 01:18:00	2020-06-02 15:18:00	1095	12.7992	43.6003
2020-06-03 01:24:00	2020-06-02 15:24:00	1096	12.8021	42.9652
2020-06-03 01:30:00	2020-06-02 15:30:00	1097	12.8017	42.7805
2020-06-03 01:36:00	2020-06-02 15:36:00	1098	12.8038	43.7497
2020-06-03 01:42:00	2020-06-02 15:42:00	1099	12.8026	44.45
2020-06-03 01:48:00	2020-06-02 15:48:00	1100	12.8003	49.6478
2020-06-03 01:54:00	2020-06-02 15:54:00	1101	12.8011	43.0342
2020-06-03 02:00:00	2020-06-02 16:00:00	1102	12.7998	46.6254
2020-06-03 02:06:00	2020-06-02 16:06:00	1103	12.8004	41.9807
2020-06-03 02:12:00	2020-06-02 16:12:00	1104	12.8016	42.1551
2020-06-03 02:18:00	2020-06-02 16:18:00	1105	12.8031	43.9329
2020-06-03 02:24:00	2020-06-02 16:24:00	1106	12.8008	44.0344
2020-06-03 02:30:00	2020-06-02 16:30:00	1107	12.8007	44.6895
2020-06-03 02:36:00	2020-06-02 16:36:00	1108	12.8008	42.3507
2020-06-03 02:42:00	2020-06-02 16:42:00	1109	12.7985	42.9349
2020-06-03 02:48:00	2020-06-02 16:48:00	1110	12.7964	44.3539
2020-06-03 02:54:00	2020-06-02 16:54:00	1111	12.8007	43.6726
2020-06-03 03:00:00	2020-06-02 17:00:00	1112	12.8007	45.0238
2020-06-03 03:06:00	2020-06-02 17:06:00	1113	12.8005	42.9925
2020-06-03 03:12:00	2020-06-02 17:12:00	1114	12.7989	42.3975
2020-06-03 03:18:00	2020-06-02 17:18:00	1115	12.798	42.4742
2020-06-03 03:24:00	2020-06-02 17:24:00	1116	12.8001	45.8692
2020-06-03 03:30:00	2020-06-02 17:30:00	1117	12.7968	43.7906
2020-06-03 03:36:00	2020-06-02 17:36:00	1118	12.8003	44.3372
2020-06-03 03:42:00	2020-06-02 17:42:00	1119	12.7977	41.3427
2020-06-03 03:48:00	2020-06-02 17:48:00	1120	12.7986	42.1181
2020-06-03 03:54:00	2020-06-02 17:54:00	1121	12.7982	41.906
2020-06-03 04:00:00	2020-06-02 18:00:00	1122	12.7977	41.5647
2020-06-03 04:06:00	2020-06-02 18:06:00	1123	12.7952	45.2666
2020-06-03 04:12:00	2020-06-02 18:12:00	1124	12.798	42.9237
2020-06-03 04:18:00	2020-06-02 18:18:00	1125	12.797	43.0755
2020-06-03 04:24:00	2020-06-02 18:24:00	1126	12.7979	43.7465
2020-06-03 04:30:00	2020-06-02 18:30:00	1127	12.7969	43.2591
2020-06-03 04:36:00	2020-06-02 18:36:00	1128	12.7974	43.3905
2020-06-03 04:42:00	2020-06-02 18:42:00	1129	12.7989	42.938
2020-06-03 04:48:00	2020-06-02 18:48:00	1130	12.7973	42.8126
2020-06-03 04:54:00	2020-06-02 18:54:00	1131	12.7943	42.9601
2020-06-03 05:00:00	2020-06-02 19:00:00	1132	12.7977	42.7062
2020-06-03 05:06:00	2020-06-02 19:06:00	1133	12.7982	42.3041
2020-06-03 05:12:00	2020-06-02 19:12:00	1134	12.7986	43.3979
2020-06-03 05:18:00	2020-06-02 19:18:00	1135	12.796	42.2241
2020-06-03 05:24:00	2020-06-02 19:24:00	1136	12.7946	45.0582
2020-06-03 05:30:00	2020-06-02 19:30:00	1137	12.7955	41.8338
2020-06-03 05:36:00	2020-06-02 19:36:00	1138	12.7944	41.8694
2020-06-03 05:42:00	2020-06-02 19:42:00	1139	12.7982	41.0194
2020-06-03 05:48:00	2020-06-02 19:48:00	1140	12.7966	40.9166
2020-06-03 05:54:00	2020-06-02 19:54:00	1141	12.7953	41.152
2020-06-03 06:00:00	2020-06-02 20:00:00	1142	12.7965	40.7084
2020-06-03 06:06:00	2020-06-02 20:06:00	1143	12.794	39.6598
2020-06-03 06:12:00	2020-06-02 20:12:00	1144	12.7952	41.3452
2020-06-03 06:18:00	2020-06-02 20:18:00	1145	12.7944	39.6734
2020-06-03 06:24:00	2020-06-02 20:24:00	1146	12.7973	39.5247
2020-06-03 06:30:00	2020-06-02 20:30:00	1147	12.7936	40.1124
2020-06-03 06:36:00	2020-06-02 20:36:00	1148	12.7944	39.1455
2020-06-03 06:42:00	2020-06-02 20:42:00	1149	12.7957	39.8152
2020-06-03 06:48:00	2020-06-02 20:48:00	1150	12.7945	39.2632
2020-06-03 06:54:00	2020-06-02 20:54:00	1151	12.7949	38.3415
2020-06-03 07:00:00	2020-06-02 21:00:00	1152	12.7931	38.72
2020-06-03 07:06:00	2020-06-02 21:06:00	1153	12.792	38.0951
2020-06-03 07:12:00	2020-06-02 21:12:00	1154	12.7949	37.4725
2020-06-03 07:18:00	2020-06-02 21:18:00	1155	12.792	38.2121
2020-06-03 07:24:00	2020-06-02 21:24:00	1156	12.7921	37.1895
2020-06-03 07:30:00	2020-06-02 21:30:00	1157	12.7921	38.0252
2020-06-03 07:36:00	2020-06-02 21:36:00	1158	12.7917	38.4738
2020-06-03 07:42:00	2020-06-02 21:42:00	1159	12.7937	38.3903
2020-06-03 07:48:00	2020-06-02 21:48:00	1160	12.7924	37.4795
2020-06-03 07:54:00	2020-06-02 21:54:00	1161	12.7917	38.2851
2020-06-03 08:00:00	2020-06-02 22:00:00	1162	12.7929	39.2749
2020-06-03 08:06:00	2020-06-02 22:06:00	1163	12.7889	38.6105
2020-06-03 08:12:00	2020-06-02 22:12:00	1164	12.7905	38.4184
2020-06-03 08:18:00	2020-06-02 22:18:00	1165	12.7896	37.6472
2020-06-03 08:24:00	2020-06-02 22:24:00	1166	12.79	41.265
2020-06-03 08:30:00	2020-06-02 22:30:00	1167	12.7904	37.9791
2020-06-03 08:36:00	2020-06-02 22:36:00	1168	12.7867	37.3281
2020-06-03 08:42:00	2020-06-02 22:42:00	1169	12.7892	37.799
2020-06-03 08:48:00	2020-06-02 22:48:00	1170	12.7891	37.0898
2020-06-03 08:54:00	2020-06-02 22:54:00	1171	12.7904	38.9408
2020-06-03 09:00:00	2020-06-02 23:00:00	1172	12.7891	38.0782
2020-06-03 09:06:00	2020-06-02 23:06:00	1173	12.7888	37.3798
2020-06-03 09:12:00	2020-06-02 23:12:00	1174	12.787	37.2334
2020-06-03 09:18:00	2020-06-02 23:18:00	1175	12.7909	37.5375
2020-06-03 09:24:00	2020-06-02 23:24:00	1176	12.7905	39.7772
2020-06-03 09:30:00	2020-06-02 23:30:00	1177	12.7914	38.2627
2020-06-03 09:36:00	2020-06-02 23:36:00	1178	12.7894	37.6577
2020-06-03 09:42:00	2020-06-02 23:42:00	1179	12.7898	37.2607
2020-06-03 09:48:00	2020-06-02 23:48:00	1180	12.7904	37.3678
2020-06-03 09:54:00	2020-06-02 23:54:00	1181	12.7908	38.113
2020-06-03 10:00:00	2020-06-03	1182	12.7909	38.2204
2020-06-03 10:06:00	2020-06-03 00:06:00	1183	12.7912	37.6246
2020-06-03 10:12:00	2020-06-03 00:12:00	1184	12.7916	37.3272
2020-06-03 10:18:00	2020-06-03 00:18:00	1185	12.7908	38.2322
2020-06-03 10:24:00	2020-06-03 00:24:00	1186	12.79	38.7393
2020-06-03 10:30:00	2020-06-03 00:30:00	1187	12.7907	37.3769
2020-06-03 10:36:00	2020-06-03 00:36:00	1188	12.7914	37.6225
2020-06-03 10:42:00	2020-06-03 00:42:00	1189	12.7914	37.1726
2020-06-03 10:48:00	2020-06-03 00:48:00	1190	12.7908	37.5295
2020-06-03 10:54:00	2020-06-03 00:54:00	1191	12.7882	38.3401
2020-06-03 11:00:00	2020-06-03 01:00:00	1192	12.7932	38.685
2020-06-03 11:06:00	2020-06-03 01:06:00	1193	12.7933	37.7656
2020-06-03 11:12:00	2020-06-03 01:12:00	1194	12.7939	37.2591
2020-06-03 11:18:00	2020-06-03 01:18:00	1195	12.7908	38.5251
2020-06-03 11:24:00	2020-06-03 01:24:00	1196	12.7935	38.5945
2020-06-03 11:30:00	2020-06-03 01:30:00	1197	12.793	37.9111
2020-06-03 11:36:00	2020-06-03 01:36:00	1198	12.7929	37.6858
2020-06-03 11:42:00	2020-06-03 01:42:00	1199	12.7924	37.8356
2020-06-03 11:48:00	2020-06-03 01:48:00	1200	12.7944	40.4402
2020-06-03 11:54:00	2020-06-03 01:54:00	1201	12.7937	41.6862
2020-06-03 12:00:00	2020-06-03 02:00:00	1202	12.795	37.2658
2020-06-03 12:06:00	2020-06-03 02:06:00	1203	12.7942	38.2585
2020-06-03 12:12:00	2020-06-03 02:12:00	1204	12.7957	36.6305
2020-06-03 12:18:00	2020-06-03 02:18:00	1205	12.7951	37.787
2020-06-03 12:24:00	2020-06-03 02:24:00	1206	12.794	37.8098
2020-06-03 12:30:00	2020-06-03 02:30:00	1207	12.796	37.2792
2020-06-03 12:36:00	2020-06-03 02:36:00	1208	12.7973	36.674
2020-06-03 12:42:00	2020-06-03 02:42:00	1209	12.7963	37.0245
2020-06-03 12:48:00	2020-06-03 02:48:00	1210	12.7958	37.616
2020-06-03 12:54:00	2020-06-03 02:54:00	1211	12.7961	37.1665
2020-06-03 13:00:00	2020-06-03 03:00:00	1212	12.7985	39.4526
2020-06-03 13:06:00	2020-06-03 03:06:00	1213	12.7993	39.1292
2020-06-03 13:12:00	2020-06-03 03:12:00	1214	12.7999	40.3606
2020-06-03 13:18:00	2020-06-03 03:18:00	1215	12.8002	39.4837
2020-06-03 13:24:00	2020-06-03 03:24:00	1216	12.7987	38.7277
2020-06-03 13:30:00	2020-06-03 03:30:00	1217	12.7967	38.9939
2020-06-03 13:36:00	2020-06-03 03:36:00	1218	12.8007	37.4477
2020-06-03 13:42:00	2020-06-03 03:42:00	1219	12.8004	43.0041
2020-06-03 13:48:00	2020-06-03 03:48:00	1220	12.8023	37.8798
2020-06-03 13:54:00	2020-06-03 03:54:00	1221	12.8007	36.5112
2020-06-03 14:00:00	2020-06-03 04:00:00	1222	12.8006	38.0383
2020-06-03 14:06:00	2020-06-03 04:06:00	1223	12.7992	36.8708
2020-06-03 14:12:00	2020-06-03 04:12:00	1224	12.7991	36.9559
2020-06-03 14:18:00	2020-06-03 04:18:00	1225	12.8026	37.8134
2020-06-03 14:24:00	2020-06-03 04:24:00	1226	12.8041	39.4559
2020-06-03 14:30:00	2020-06-03 04:30:00	1227	12.8019	48.5584
2020-06-03 14:36:00	2020-06-03 04:36:00	1228	12.8011	37.7894
2020-06-03 14:42:00	2020-06-03 04:42:00	1229	12.8021	38.9209
2020-06-03 14:48:00	2020-06-03 04:48:00	1230	12.8026	37.9732
2020-06-03 14:54:00	2020-06-03 04:54:00	1231	12.8014	36.9925
2020-06-03 15:00:00	2020-06-03 05:00:00	1232	12.8027	44.7662
2020-06-03 15:06:00	2020-06-03 05:06:00	1233	12.8025	36.7884
2020-06-03 15:12:00	2020-06-03 05:12:00	1234	12.8037	38.6234
2020-06-03 15:18:00	2020-06-03 05:18:00	1235	12.804	37.8437
2020-06-03 15:24:00	2020-06-03 05:24:00	1236	12.8024	54.9534
2020-06-03 15:30:00	2020-06-03 05:30:00	1237	12.805	39.0519
2020-06-03 15:36:00	2020-06-03 05:36:00	1238	12.804	38.8071
2020-06-03 15:42:00	2020-06-03 05:42:00	1239	12.8039	39.5295
2020-06-03 15:48:00	2020-06-03 05:48:00	1240	12.8032	38.1701
2020-06-03 15:54:00	2020-06-03 05:54:00	1241	12.8033	38.7853
2020-06-03 16:00:00	2020-06-03 06:00:00	1242	12.8024	59.2839
2020-06-03 16:06:00	2020-06-03 06:06:00	1243	12.8051	37.8686
2020-06-03 16:12:00	2020-06-03 06:12:00	1244	12.8052	37.5493
2020-06-03 16:18:00	2020-06-03 06:18:00	1245	12.8041	39.9406
2020-06-03 16:24:00	2020-06-03 06:24:00	1246	12.8017	37.7261
2020-06-03 16:30:00	2020-06-03 06:30:00	1247	12.8051	40.1272
2020-06-03 16:36:00	2020-06-03 06:36:00	1248	12.8034	38.5454
2020-06-03 16:42:00	2020-06-03 06:42:00	1249	12.8061	37.3877
2020-06-03 16:48:00	2020-06-03 06:48:00	1250	12.8025	36.9428
2020-06-03 16:54:00	2020-06-03 06:54:00	1251	12.8038	36.7798
2020-06-03 17:00:00	2020-06-03 07:00:00	1252	12.8027	37.287
2020-06-03 17:06:00	2020-06-03 07:06:00	1253	12.8024	40.3191
2020-06-03 17:12:00	2020-06-03 07:12:00	1254	12.8021	37.3608
2020-06-03 17:18:00	2020-06-03 07:18:00	1255	12.803	36.7149
2020-06-03 17:24:00	2020-06-03 07:24:00	1256	12.8026	36.2111
2020-06-03 17:30:00	2020-06-03 07:30:00	1257	12.8035	36.4744
2020-06-03 17:36:00	2020-06-03 07:36:00	1258	12.802	37.8407
2020-06-03 17:42:00	2020-06-03 07:42:00	1259	12.8	38.7096
2020-06-03 17:48:00	2020-06-03 07:48:00	1260	12.8032	39.6494
2020-06-03 17:54:00	2020-06-03 07:54:00	1261	12.7998	37.0379
2020-06-03 18:00:00	2020-06-03 08:00:00	1262	12.8028	37.2662
2020-06-03 18:06:00	2020-06-03 08:06:00	1263	12.8	38.3002
2020-06-03 18:12:00	2020-06-03 08:12:00	1264	12.8007	39.0668
2020-06-03 18:18:00	2020-06-03 08:18:00	1265	12.8029	47.0633
2020-06-03 18:24:00	2020-06-03 08:24:00	1266	12.8007	36.7552
2020-06-03 18:30:00	2020-06-03 08:30:00	1267	12.7991	36.4809
2020-06-03 18:36:00	2020-06-03 08:36:00	1268	12.7979	37.3264
2020-06-03 18:42:00	2020-06-03 08:42:00	1269	12.801	36.9129
2020-06-03 18:48:00	2020-06-03 08:48:00	1270	12.8001	37.6134
2020-06-03 18:54:00	2020-06-03 08:54:00	1271	12.8022	37.3899
2020-06-03 19:00:00	2020-06-03 09:00:00	1272	12.8002	41.5122
2020-06-03 19:06:00	2020-06-03 09:06:00	1273	12.7985	47.4836
2020-06-03 19:12:00	2020-06-03 09:12:00	1274	12.8001	37.8686
2020-06-03 19:18:00	2020-06-03 09:18:00	1275	12.7984	37.3291
2020-06-03 19:24:00	2020-06-03 09:24:00	1276	12.7983	38.0885
2020-06-03 19:30:00	2020-06-03 09:30:00	1277	12.7991	37.7825
2020-06-03 19:36:00	2020-06-03 09:36:00	1278	12.7984	36.6632
2020-06-03 19:42:00	2020-06-03 09:42:00	1279	12.7987	38.2102
2020-06-03 19:48:00	2020-06-03 09:48:00	1280	12.7977	37.2605
2020-06-03 19:54:00	2020-06-03 09:54:00	1281	12.7977	36.6034
2020-06-03 20:00:00	2020-06-03 10:00:00	1282	12.7963	37.8427
2020-06-03 20:06:00	2020-06-03 10:06:00	1283	12.796	36.6645
2020-06-03 20:12:00	2020-06-03 10:12:00	1284	12.7968	36.3521
2020-06-03 20:18:00	2020-06-03 10:18:00	1285	12.7987	36.0071
2020-06-03 20:24:00	2020-06-03 10:24:00	1286	12.7968	40.9675
2020-06-03 20:30:00	2020-06-03 10:30:00	1287	12.7963	36.3936
2020-06-03 20:36:00	2020-06-03 10:36:00	1288	12.7938	37.0411
2020-06-03 20:42:00	2020-06-03 10:42:00	1289	12.797	40.1079
2020-06-03 20:48:00	2020-06-03 10:48:00	1290	12.7976	35.8612
2020-06-03 20:54:00	2020-06-03 10:54:00	1291	12.7936	35.9306
2020-06-03 21:00:00	2020-06-03 11:00:00	1292	12.7936	36.2428
2020-06-03 21:06:00	2020-06-03 11:06:00	1293	12.7943	47.5755
2020-06-03 21:12:00	2020-06-03 11:12:00	1294	12.795	41.6142
2020-06-03 21:18:00	2020-06-03 11:18:00	1295	12.7949	37.1335
2020-06-03 21:24:00	2020-06-03 11:24:00	1296	12.7952	38.7556
2020-06-03 21:30:00	2020-06-03 11:30:00	1297	12.794	37.161
2020-06-03 21:36:00	2020-06-03 11:36:00	1298	12.7951	36.4211
2020-06-03 21:42:00	2020-06-03 11:42:00	1299	12.7971	47.0389
2020-06-03 21:48:00	2020-06-03 11:48:00	1300	12.7958	35.7992
2020-06-03 21:54:00	2020-06-03 11:54:00	1301	12.7948	36.1003
2020-06-03 22:00:00	2020-06-03 12:00:00	1302	12.7934	35.6561
2020-06-03 22:06:00	2020-06-03 12:06:00	1303	12.794	34.5267
2020-06-03 22:12:00	2020-06-03 12:12:00	1304	12.792	35.3478
2020-06-03 22:18:00	2020-06-03 12:18:00	1305	12.7927	36.8983
2020-06-03 22:24:00	2020-06-03 12:24:00	1306	12.7899	35.1146
2020-06-03 22:30:00	2020-06-03 12:30:00	1307	12.7938	35.1016
2020-06-03 22:36:00	2020-06-03 12:36:00	1308	12.7919	34.4436
2020-06-03 22:42:00	2020-06-03 12:42:00	1309	12.794	34.7088
2020-06-03 22:48:00	2020-06-03 12:48:00	1310	12.7919	42.3859
2020-06-03 22:54:00	2020-06-03 12:54:00	1311	12.7917	38.1811
2020-06-03 23:00:00	2020-06-03 13:00:00	1312	12.7921	35.8098
2020-06-03 23:06:00	2020-06-03 13:06:00	1313	12.7921	34.6927
2020-06-03 23:12:00	2020-06-03 13:12:00	1314	12.7918	34.7615
2020-06-03 23:18:00	2020-06-03 13:18:00	1315	12.79	34.8193
2020-06-03 23:24:00	2020-06-03 13:24:00	1316	12.7901	34.6504
2020-06-03 23:30:00	2020-06-03 13:30:00	1317	12.7903	35.6533
2020-06-03 23:36:00	2020-06-03 13:36:00	1318	12.7899	34.5071
2020-06-03 23:42:00	2020-06-03 13:42:00	1319	12.791	33.0774
2020-06-03 23:48:00	2020-06-03 13:48:00	1320	12.7881	34.743
2020-06-03 23:54:00	2020-06-03 13:54:00	1321	12.7888	34.603
2020-06-04	2020-06-03 14:00:00	1322	12.7918	43.2595
2020-06-04 00:06:00	2020-06-03 14:06:00	1323	12.7889	34.2281
2020-06-04 00:12:00	2020-06-03 14:12:00	1324	12.7888	34.5238
2020-06-04 00:18:00	2020-06-03 14:18:00	1325	12.787	35.2145
2020-06-04 00:24:00	2020-06-03 14:24:00	1326	12.7905	33.8877
2020-06-04 00:30:00	2020-06-03 14:30:00	1327	12.7898	34.8466
2020-06-04 00:36:00	2020-06-03 14:36:00	1328	12.7874	33.8482
2020-06-04 00:42:00	2020-06-03 14:42:00	1329	12.7872	34.9072
2020-06-04 00:48:00	2020-06-03 14:48:00	1330	12.7885	33.6447
2020-06-04 00:54:00	2020-06-03 14:54:00	1331	12.7896	33.9154
2020-06-04 01:00:00	2020-06-03 15:00:00	1332	12.7891	33.8043
2020-06-04 01:06:00	2020-06-03 15:06:00	1333	12.7899	34.5867
2020-06-04 01:12:00	2020-06-03 15:12:00	1334	12.789	37.0643
2020-06-04 01:18:00	2020-06-03 15:18:00	1335	12.7894	34.6103
2020-06-04 01:24:00	2020-06-03 15:24:00	1336	12.7886	33.8903
2020-06-04 01:30:00	2020-06-03 15:30:00	1337	12.7856	33.0316
2020-06-04 01:36:00	2020-06-03 15:36:00	1338	12.7885	34.0546
2020-06-04 01:42:00	2020-06-03 15:42:00	1339	12.7867	34.2865
2020-06-04 01:48:00	2020-06-03 15:48:00	1340	12.7862	33.0391
2020-06-04 01:54:00	2020-06-03 15:54:00	1341	12.7878	47.3507
2020-06-04 02:00:00	2020-06-03 16:00:00	1342	12.7883	33.4268
2020-06-04 02:06:00	2020-06-03 16:06:00	1343	12.7858	31.7835
2020-06-04 02:12:00	2020-06-03 16:12:00	1344	12.787	31.9652
2020-06-04 02:18:00	2020-06-03 16:18:00	1345	12.7891	32.7998
2020-06-04 02:24:00	2020-06-03 16:24:00	1346	12.7857	33.1284
2020-06-04 02:30:00	2020-06-03 16:30:00	1347	12.7891	33.3148
2020-06-04 02:36:00	2020-06-03 16:36:00	1348	12.7858	32.4528
2020-06-04 02:42:00	2020-06-03 16:42:00	1349	12.7861	32.9353
2020-06-04 02:48:00	2020-06-03 16:48:00	1350	12.7869	32.5405
2020-06-04 02:54:00	2020-06-03 16:54:00	1351	12.7877	33.0694
2020-06-04 03:00:00	2020-06-03 17:00:00	1352	12.7889	33.3433
2020-06-04 03:06:00	2020-06-03 17:06:00	1353	12.7885	32.6789
2020-06-04 03:12:00	2020-06-03 17:12:00	1354	12.786	33.0202
2020-06-04 03:18:00	2020-06-03 17:18:00	1355	12.7868	32.5051
2020-06-04 03:24:00	2020-06-03 17:24:00	1356	12.7882	32.8421
2020-06-04 03:30:00	2020-06-03 17:30:00	1357	12.786	32.7349
2020-06-04 03:36:00	2020-06-03 17:36:00	1358	12.7875	33.033
2020-06-04 03:42:00	2020-06-03 17:42:00	1359	12.7879	32.0605
2020-06-04 03:48:00	2020-06-03 17:48:00	1360	12.7859	33.0138
2020-06-04 03:54:00	2020-06-03 17:54:00	1361	12.7859	31.9886
2020-06-04 04:00:00	2020-06-03 18:00:00	1362	12.7852	32.6319
2020-06-04 04:06:00	2020-06-03 18:06:00	1363	12.7849	33.0881
2020-06-04 04:12:00	2020-06-03 18:12:00	1364	12.7854	32.3449
2020-06-04 04:18:00	2020-06-03 18:18:00	1365	12.7851	32.3366
2020-06-04 04:24:00	2020-06-03 18:24:00	1366	12.7854	31.81
2020-06-04 04:30:00	2020-06-03 18:30:00	1367	12.7865	31.2298
2020-06-04 04:36:00	2020-06-03 18:36:00	1368	12.786	31.8557
2020-06-04 04:42:00	2020-06-03 18:42:00	1369	12.7852	32.0161
2020-06-04 04:48:00	2020-06-03 18:48:00	1370	12.7876	31.2332
2020-06-04 04:54:00	2020-06-03 18:54:00	1371	12.7843	32.1001
2020-06-04 05:00:00	2020-06-03 19:00:00	1372	12.7846	31.4272
2020-06-04 05:06:00	2020-06-03 19:06:00	1373	12.7841	31.6917
2020-06-04 05:12:00	2020-06-03 19:12:00	1374	12.786	31.1938
2020-06-04 05:18:00	2020-06-03 19:18:00	1375	12.7851	31.52
2020-06-04 05:24:00	2020-06-03 19:24:00	1376	12.7834	31.6126
2020-06-04 05:30:00	2020-06-03 19:30:00	1377	12.7872	31.9811
2020-06-04 05:36:00	2020-06-03 19:36:00	1378	12.7846	32.4994
2020-06-04 05:42:00	2020-06-03 19:42:00	1379	12.786	31.5769
2020-06-04 05:48:00	2020-06-03 19:48:00	1380	12.7872	31.42
2020-06-04 05:54:00	2020-06-03 19:54:00	1381	12.785	30.7117
2020-06-04 06:00:00	2020-06-03 20:00:00	1382	12.7812	31.1642
2020-06-04 06:06:00	2020-06-03 20:06:00	1383	12.7814	31.7977
2020-06-04 06:12:00	2020-06-03 20:12:00	1384	12.7819	32.0971
2020-06-04 06:18:00	2020-06-03 20:18:00	1385	12.783	31.0548
2020-06-04 06:24:00	2020-06-03 20:24:00	1386	12.7841	31.6262
2020-06-04 06:30:00	2020-06-03 20:30:00	1387	12.7822	31.0765
2020-06-04 06:36:00	2020-06-03 20:36:00	1388	12.7825	31.1724
2020-06-04 06:42:00	2020-06-03 20:42:00	1389	12.7823	31.0242
2020-06-04 06:48:00	2020-06-03 20:48:00	1390	12.7837	31.3411
2020-06-04 06:54:00	2020-06-03 20:54:00	1391	12.7835	30.9854
2020-06-04 07:00:00	2020-06-03 21:00:00	1392	12.7843	30.8885
2020-06-04 07:06:00	2020-06-03 21:06:00	1393	12.7844	31.8319
2020-06-04 07:12:00	2020-06-03 21:12:00	1394	12.783	31.8333
2020-06-04 07:18:00	2020-06-03 21:18:00	1395	12.7826	31.3751
2020-06-04 07:24:00	2020-06-03 21:24:00	1396	12.7857	31.9298
2020-06-04 07:30:00	2020-06-03 21:30:00	1397	12.7831	30.7833
2020-06-04 07:36:00	2020-06-03 21:36:00	1398	12.7842	31.5033
2020-06-04 07:42:00	2020-06-03 21:42:00	1399	12.7823	31.6732
2020-06-04 07:48:00	2020-06-03 21:48:00	1400	12.7833	32.4648
2020-06-04 07:54:00	2020-06-03 21:54:00	1401	12.7832	31.4386
2020-06-04 08:00:00	2020-06-03 22:00:00	1402	12.784	33.1948
2020-06-04 08:06:00	2020-06-03 22:06:00	1403	12.7828	31.3787
2020-06-04 08:12:00	2020-06-03 22:12:00	1404	12.7807	30.8118
2020-06-04 08:18:00	2020-06-03 22:18:00	1405	12.7819	30.8067
2020-06-04 08:24:00	2020-06-03 22:24:00	1406	12.7837	31.7027
2020-06-04 08:30:00	2020-06-03 22:30:00	1407	12.7819	31.5318
2020-06-04 08:36:00	2020-06-03 22:36:00	1408	12.7832	31.4274
2020-06-04 08:42:00	2020-06-03 22:42:00	1409	12.7842	31.0647
2020-06-04 08:48:00	2020-06-03 22:48:00	1410	12.7836	31.5794
2020-06-04 08:54:00	2020-06-03 22:54:00	1411	12.7827	30.9791
2020-06-04 09:00:00	2020-06-03 23:00:00	1412	12.7819	32.7167
2020-06-04 09:06:00	2020-06-03 23:06:00	1413	12.7811	31.0403
2020-06-04 09:12:00	2020-06-03 23:12:00	1414	12.7815	30.7986
2020-06-04 09:18:00	2020-06-03 23:18:00	1415	12.7826	30.8641
2020-06-04 09:24:00	2020-06-03 23:24:00	1416	12.7822	34.8673
2020-06-04 09:30:00	2020-06-03 23:30:00	1417	12.7807	32.5352
2020-06-04 09:36:00	2020-06-03 23:36:00	1418	12.7777	31.2462
2020-06-04 09:42:00	2020-06-03 23:42:00	1419	12.7794	31.7908
2020-06-04 09:48:00	2020-06-03 23:48:00	1420	12.7783	30.511
2020-06-04 09:54:00	2020-06-03 23:54:00	1421	12.7777	31.1248
2020-06-04 10:00:00	2020-06-04	1422	12.7771	30.777
2020-06-04 10:06:00	2020-06-04 00:06:00	1423	12.7765	29.7609
2020-06-04 10:12:00	2020-06-04 00:12:00	1424	12.7759	30.6567
2020-06-04 10:18:00	2020-06-04 00:18:00	1425	12.7749	31.0995
2020-06-04 10:24:00	2020-06-04 00:24:00	1426	12.7747	30.3142
2020-06-04 10:30:00	2020-06-04 00:30:00	1427	12.7784	31.1443
2020-06-04 10:36:00	2020-06-04 00:36:00	1428	12.7793	30.547
2020-06-04 10:42:00	2020-06-04 00:42:00	1429	12.7786	37.1321
2020-06-04 10:48:00	2020-06-04 00:48:00	1430	12.7779	31.3049
2020-06-04 10:54:00	2020-06-04 00:54:00	1431	12.7769	31.4251
2020-06-04 11:00:00	2020-06-04 01:00:00	1432	12.7812	30.9801
2020-06-04 11:06:00	2020-06-04 01:06:00	1433	12.7819	30.8386
2020-06-04 11:12:00	2020-06-04 01:12:00	1434	12.7807	30.3321
2020-06-04 11:18:00	2020-06-04 01:18:00	1435	12.7815	30.9223
2020-06-04 11:24:00	2020-06-04 01:24:00	1436	12.7801	30.2743
2020-06-04 11:30:00	2020-06-04 01:30:00	1437	12.7816	30.8301
2020-06-04 11:36:00	2020-06-04 01:36:00	1438	12.7825	31.4878
2020-06-04 11:42:00	2020-06-04 01:42:00	1439	12.7796	31.6581
2020-06-04 11:48:00	2020-06-04 01:48:00	1440	12.7851	29.7501
2020-06-04 11:54:00	2020-06-04 01:54:00	1441	12.7825	29.2914
2020-06-04 12:00:00	2020-06-04 02:00:00	1442	12.7853	29.8311
2020-06-04 12:06:00	2020-06-04 02:06:00	1443	12.7866	30.3163
2020-06-04 12:12:00	2020-06-04 02:12:00	1444	12.7845	29.8378
2020-06-04 12:18:00	2020-06-04 02:18:00	1445	12.7864	29.8014
2020-06-04 12:24:00	2020-06-04 02:24:00	1446	12.786	30.5537
2020-06-04 12:30:00	2020-06-04 02:30:00	1447	12.7862	29.3327
2020-06-04 12:36:00	2020-06-04 02:36:00	1448	12.788	29.244
2020-06-04 12:42:00	2020-06-04 02:42:00	1449	12.7904	30.9211
2020-06-04 12:48:00	2020-06-04 02:48:00	1450	12.7905	29.5851
2020-06-04 12:54:00	2020-06-04 02:54:00	1451	12.7893	30.4186
2020-06-04 13:00:00	2020-06-04 03:00:00	1452	12.7911	30.3856
2020-06-04 13:06:00	2020-06-04 03:06:00	1453	12.7922	29.5014
2020-06-04 13:12:00	2020-06-04 03:12:00	1454	12.7919	30.536
2020-06-04 13:18:00	2020-06-04 03:18:00	1455	12.793	29.2874
2020-06-04 13:24:00	2020-06-04 03:24:00	1456	12.7921	28.905
2020-06-04 13:30:00	2020-06-04 03:30:00	1457	12.7929	29.4817
2020-06-04 13:36:00	2020-06-04 03:36:00	1458	12.7924	29.7752
2020-06-04 13:42:00	2020-06-04 03:42:00	1459	12.7952	30.0051
2020-06-04 13:48:00	2020-06-04 03:48:00	1460	12.7932	29.3295
2020-06-04 13:54:00	2020-06-04 03:54:00	1461	12.7952	29.6954
2020-06-04 14:00:00	2020-06-04 04:00:00	1462	12.7946	30.1435
2020-06-04 14:06:00	2020-06-04 04:06:00	1463	12.7936	30.1669
2020-06-04 14:12:00	2020-06-04 04:12:00	1464	12.7974	30.6718
2020-06-04 14:18:00	2020-06-04 04:18:00	1465	12.7966	29.6382
2020-06-04 14:24:00	2020-06-04 04:24:00	1466	12.7981	29.1612
2020-06-04 14:30:00	2020-06-04 04:30:00	1467	12.798	29.5293
2020-06-04 14:36:00	2020-06-04 04:36:00	1468	12.7981	29.9319
2020-06-04 14:42:00	2020-06-04 04:42:00	1469	12.8025	29.335
2020-06-04 14:48:00	2020-06-04 04:48:00	1470	12.8033	29.837
2020-06-04 14:54:00	2020-06-04 04:54:00	1471	12.7978	29.8838
2020-06-04 15:00:00	2020-06-04 05:00:00	1472	12.799	29.3527
2020-06-04 15:06:00	2020-06-04 05:06:00	1473	12.801	29.4953
2020-06-04 15:12:00	2020-06-04 05:12:00	1474	12.8024	29.6231
2020-06-04 15:18:00	2020-06-04 05:18:00	1475	12.8003	30.0914
2020-06-04 15:24:00	2020-06-04 05:24:00	1476	12.7988	29.9854
2020-06-04 15:30:00	2020-06-04 05:30:00	1477	12.7981	29.7774
2020-06-04 15:36:00	2020-06-04 05:36:00	1478	12.8023	30.07
2020-06-04 15:42:00	2020-06-04 05:42:00	1479	12.7983	29.9552
2020-06-04 15:48:00	2020-06-04 05:48:00	1480	12.803	29.6669
2020-06-04 15:54:00	2020-06-04 05:54:00	1481	12.8015	28.9882
2020-06-04 16:00:00	2020-06-04 06:00:00	1482	12.8019	29.6113
2020-06-04 16:06:00	2020-06-04 06:06:00	1483	12.803	29.0401
2020-06-04 16:12:00	2020-06-04 06:12:00	1484	12.8065	29.0273
2020-06-04 16:18:00	2020-06-04 06:18:00	1485	12.8084	33.3773
2020-06-04 16:24:00	2020-06-04 06:24:00	1486	12.8045	29.9434
2020-06-04 16:30:00	2020-06-04 06:30:00	1487	12.806	29.4884
2020-06-04 16:36:00	2020-06-04 06:36:00	1488	12.8079	29.4534
2020-06-04 16:42:00	2020-06-04 06:42:00	1489	12.8069	29.1762
2020-06-04 16:48:00	2020-06-04 06:48:00	1490	12.8065	29.9699
2020-06-04 16:54:00	2020-06-04 06:54:00	1491	12.808	29.1339
2020-06-04 17:00:00	2020-06-04 07:00:00	1492	12.8068	28.9162
2020-06-04 17:06:00	2020-06-04 07:06:00	1493	12.8095	28.7359
2020-06-04 17:12:00	2020-06-04 07:12:00	1494	12.8094	30.5377
2020-06-04 17:18:00	2020-06-04 07:18:00	1495	12.8098	30.187
2020-06-04 17:24:00	2020-06-04 07:24:00	1496	12.8101	29.2035
2020-06-04 17:30:00	2020-06-04 07:30:00	1497	12.8097	29.2513
2020-06-04 17:36:00	2020-06-04 07:36:00	1498	12.8106	28.7574
2020-06-04 17:42:00	2020-06-04 07:42:00	1499	12.807	29.4084
2020-06-04 17:48:00	2020-06-04 07:48:00	1500	12.807	29.2112
2020-06-04 17:54:00	2020-06-04 07:54:00	1501	12.8091	28.429
2020-06-04 18:00:00	2020-06-04 08:00:00	1502	12.807	28.0226
2020-06-04 18:06:00	2020-06-04 08:06:00	1503	12.8082	29.1431
2020-06-04 18:12:00	2020-06-04 08:12:00	1504	12.8072	28.6921
2020-06-04 18:18:00	2020-06-04 08:18:00	1505	12.8092	28.1416
2020-06-04 18:24:00	2020-06-04 08:24:00	1506	12.8065	28.9962
2020-06-04 18:30:00	2020-06-04 08:30:00	1507	12.8059	29.9196
2020-06-04 18:36:00	2020-06-04 08:36:00	1508	12.8044	28.6353
2020-06-04 18:42:00	2020-06-04 08:42:00	1509	12.8035	29.2809
2020-06-04 18:48:00	2020-06-04 08:48:00	1510	12.8032	29.0731
2020-06-04 18:54:00	2020-06-04 08:54:00	1511	12.8044	27.6994
2020-06-04 19:00:00	2020-06-04 09:00:00	1512	12.8033	28.5733
2020-06-04 19:06:00	2020-06-04 09:06:00	1513	12.8007	28.6622
2020-06-04 19:12:00	2020-06-04 09:12:00	1514	12.8036	28.8861
2020-06-04 19:18:00	2020-06-04 09:18:00	1515	12.8005	27.4097
2020-06-04 19:24:00	2020-06-04 09:24:00	1516	12.8021	28.1014
2020-06-04 19:30:00	2020-06-04 09:30:00	1517	12.7964	28.4837
2020-06-04 19:36:00	2020-06-04 09:36:00	1518	12.7992	26.8679
2020-06-04 19:42:00	2020-06-04 09:42:00	1519	12.7962	27.9127
2020-06-04 19:48:00	2020-06-04 09:48:00	1520	12.7942	28.5668
2020-06-04 19:54:00	2020-06-04 09:54:00	1521	12.7982	28.6923
2020-06-04 20:00:00	2020-06-04 10:00:00	1522	12.796	27.6056
2020-06-04 20:06:00	2020-06-04 10:06:00	1523	12.7946	27.8236
2020-06-04 20:12:00	2020-06-04 10:12:00	1524	12.793	28.0543
2020-06-04 20:18:00	2020-06-04 10:18:00	1525	12.7921	27.3932
2020-06-04 20:24:00	2020-06-04 10:24:00	1526	12.7919	28.0096
2020-06-04 20:30:00	2020-06-04 10:30:00	1527	12.7936	27.4754
2020-06-04 20:36:00	2020-06-04 10:36:00	1528	12.791	27.5725
2020-06-04 20:42:00	2020-06-04 10:42:00	1529	12.789	27.7711
2020-06-04 20:48:00	2020-06-04 10:48:00	1530	12.7891	27.38
2020-06-04 20:54:00	2020-06-04 10:54:00	1531	12.7903	27.8368
2020-06-04 21:00:00	2020-06-04 11:00:00	1532	12.7889	27.9318
2020-06-04 21:06:00	2020-06-04 11:06:00	1533	12.7884	27.2524
2020-06-04 21:12:00	2020-06-04 11:12:00	1534	12.7876	27.5641
2020-06-04 21:18:00	2020-06-04 11:18:00	1535	12.7884	28.3677
2020-06-04 21:24:00	2020-06-04 11:24:00	1536	12.7878	27.1895
2020-06-04 21:30:00	2020-06-04 11:30:00	1537	12.7844	26.8712
2020-06-04 21:36:00	2020-06-04 11:36:00	1538	12.7854	27.8995
2020-06-04 21:42:00	2020-06-04 11:42:00	1539	12.7835	27.6036
2020-06-04 21:48:00	2020-06-04 11:48:00	1540	12.7842	27.7058
2020-06-04 21:54:00	2020-06-04 11:54:00	1541	12.7832	27.6948
2020-06-04 22:00:00	2020-06-04 12:00:00	1542	12.7825	27.4192
2020-06-04 22:06:00	2020-06-04 12:06:00	1543	12.7814	26.8946
2020-06-04 22:12:00	2020-06-04 12:12:00	1544	12.78	27.5238
2020-06-04 22:18:00	2020-06-04 12:18:00	1545	12.7791	27.858
2020-06-04 22:24:00	2020-06-04 12:24:00	1546	12.7812	27.9288
2020-06-04 22:30:00	2020-06-04 12:30:00	1547	12.78	27.0029
2020-06-04 22:36:00	2020-06-04 12:36:00	1548	12.779	27.8551
2020-06-04 22:42:00	2020-06-04 12:42:00	1549	12.778	27.2542
2020-06-04 22:48:00	2020-06-04 12:48:00	1550	12.7774	27.2212
2020-06-04 22:54:00	2020-06-04 12:54:00	1551	12.7774	27.7524
2020-06-04 23:00:00	2020-06-04 13:00:00	1552	12.775	26.4927
2020-06-04 23:06:00	2020-06-04 13:06:00	1553	12.7774	27.1142
2020-06-04 23:12:00	2020-06-04 13:12:00	1554	12.7763	26.5208
2020-06-04 23:18:00	2020-06-04 13:18:00	1555	12.7746	26.4467
2020-06-04 23:24:00	2020-06-04 13:24:00	1556	12.7754	26.6221
2020-06-04 23:30:00	2020-06-04 13:30:00	1557	12.7752	26.9127
2020-06-04 23:36:00	2020-06-04 13:36:00	1558	12.774	26.4182
2020-06-04 23:42:00	2020-06-04 13:42:00	1559	12.7749	26.756
2020-06-04 23:48:00	2020-06-04 13:48:00	1560	12.7738	27.6229
2020-06-04 23:54:00	2020-06-04 13:54:00	1561	12.7727	26.9127
2020-06-05	2020-06-04 14:00:00	1562	12.7712	26.035
2020-06-05 00:06:00	2020-06-04 14:06:00	1563	12.7693	25.9133
2020-06-05 00:12:00	2020-06-04 14:12:00	1564	12.7737	26.5067
2020-06-05 00:18:00	2020-06-04 14:18:00	1565	12.7713	25.942
2020-06-05 00:24:00	2020-06-04 14:24:00	1566	12.7721	26.8008
2020-06-05 00:30:00	2020-06-04 14:30:00	1567	12.7689	26.1213
2020-06-05 00:36:00	2020-06-04 14:36:00	1568	12.7679	26.745
2020-06-05 00:42:00	2020-06-04 14:42:00	1569	12.7706	26.811
2020-06-05 00:48:00	2020-06-04 14:48:00	1570	12.7684	25.7994
2020-06-05 00:54:00	2020-06-04 14:54:00	1571	12.7702	27.0446
2020-06-05 01:00:00	2020-06-04 15:00:00	1572	12.7675	25.6736
2020-06-05 01:06:00	2020-06-04 15:06:00	1573	12.7687	26.8293
2020-06-05 01:12:00	2020-06-04 15:12:00	1574	12.7696	26.6478
2020-06-05 01:18:00	2020-06-04 15:18:00	1575	12.7675	25.5436
2020-06-05 01:24:00	2020-06-04 15:24:00	1576	12.7665	25.8791
2020-06-05 01:30:00	2020-06-04 15:30:00	1577	12.7679	26.1301
2020-06-05 01:36:00	2020-06-04 15:36:00	1578	12.7649	26.6054
2020-06-05 01:42:00	2020-06-04 15:42:00	1579	12.7637	25.2861
2020-06-05 01:48:00	2020-06-04 15:48:00	1580	12.7659	26.1311
2020-06-05 01:54:00	2020-06-04 15:54:00	1581	12.7637	25.7922
2020-06-05 02:00:00	2020-06-04 16:00:00	1582	12.7647	25.7344
2020-06-05 02:06:00	2020-06-04 16:06:00	1583	12.7642	26.0086
2020-06-05 02:12:00	2020-06-04 16:12:00	1584	12.7621	25.9109
2020-06-05 02:18:00	2020-06-04 16:18:00	1585	12.7602	25.5084
2020-06-05 02:24:00	2020-06-04 16:24:00	1586	12.7641	25.5775
2020-06-05 02:30:00	2020-06-04 16:30:00	1587	12.7614	25.6358
2020-06-05 02:36:00	2020-06-04 16:36:00	1588	12.7609	25.4738
2020-06-05 02:42:00	2020-06-04 16:42:00	1589	12.7649	26.0004
2020-06-05 02:48:00	2020-06-04 16:48:00	1590	12.7622	25.906
2020-06-05 02:54:00	2020-06-04 16:54:00	1591	12.7602	25.1227
2020-06-05 03:00:00	2020-06-04 17:00:00	1592	12.762	25.5615
2020-06-05 03:06:00	2020-06-04 17:06:00	1593	12.7611	25.7064
2020-06-05 03:12:00	2020-06-04 17:12:00	1594	12.7607	25.1815
2020-06-05 03:18:00	2020-06-04 17:18:00	1595	12.7597	25.0057
2020-06-05 03:24:00	2020-06-04 17:24:00	1596	12.7586	25.3722
2020-06-05 03:30:00	2020-06-04 17:30:00	1597	12.7618	25.3974
2020-06-05 03:36:00	2020-06-04 17:36:00	1598	12.7619	33.7544
2020-06-05 03:42:00	2020-06-04 17:42:00	1599	12.7586	25.4955
2020-06-05 03:48:00	2020-06-04 17:48:00	1600	12.7574	25.4467
2020-06-05 03:54:00	2020-06-04 17:54:00	1601	12.7576	25.5808
2020-06-05 04:00:00	2020-06-04 18:00:00	1602	12.7565	25.6364
2020-06-05 04:06:00	2020-06-04 18:06:00	1603	12.7605	25.6883
2020-06-05 04:12:00	2020-06-04 18:12:00	1604	12.7585	25.0265
2020-06-05 04:18:00	2020-06-04 18:18:00	1605	12.7566	26.1783
2020-06-05 04:24:00	2020-06-04 18:24:00	1606	12.756	25.2159
2020-06-05 04:30:00	2020-06-04 18:30:00	1607	12.7551	25.266
2020-06-05 04:36:00	2020-06-04 18:36:00	1608	12.7535	24.3108
2020-06-05 04:42:00	2020-06-04 18:42:00	1609	12.7569	25.0816
2020-06-05 04:48:00	2020-06-04 18:48:00	1610	12.7567	25.6482
2020-06-05 04:54:00	2020-06-04 18:54:00	1611	12.7569	25.1512
2020-06-05 05:00:00	2020-06-04 19:00:00	1612	12.7555	25.0279
2020-06-05 05:06:00	2020-06-04 19:06:00	1613	12.7554	24.6305
2020-06-05 05:12:00	2020-06-04 19:12:00	1614	12.7535	24.4847
2020-06-05 05:18:00	2020-06-04 19:18:00	1615	12.7551	24.9168
2020-06-05 05:24:00	2020-06-04 19:24:00	1616	12.7548	25.0397
2020-06-05 05:30:00	2020-06-04 19:30:00	1617	12.7543	28.4327
2020-06-05 05:36:00	2020-06-04 19:36:00	1618	12.7537	25.0637
2020-06-05 05:42:00	2020-06-04 19:42:00	1619	12.7537	24.325
2020-06-05 05:48:00	2020-06-04 19:48:00	1620	12.7535	24.8633
2020-06-05 05:54:00	2020-06-04 19:54:00	1621	12.7551	24.9683
2020-06-05 06:00:00	2020-06-04 20:00:00	1622	12.7541	24.5658
2020-06-05 06:06:00	2020-06-04 20:06:00	1623	12.7536	25.2556
2020-06-05 06:12:00	2020-06-04 20:12:00	1624	12.7518	24.487
2020-06-05 06:18:00	2020-06-04 20:18:00	1625	12.7512	25.176
2020-06-05 06:24:00	2020-06-04 20:24:00	1626	12.7548	24.8201
2020-06-05 06:30:00	2020-06-04 20:30:00	1627	12.7521	26.0486
2020-06-05 06:36:00	2020-06-04 20:36:00	1628	12.7523	25.0839
2020-06-05 06:42:00	2020-06-04 20:42:00	1629	12.7509	31.5969
2020-06-05 06:48:00	2020-06-04 20:48:00	1630	12.7512	25.0413
2020-06-05 06:54:00	2020-06-04 20:54:00	1631	12.7512	24.8441
2020-06-05 07:00:00	2020-06-04 21:00:00	1632	12.7507	25.5281
2020-06-05 07:06:00	2020-06-04 21:06:00	1633	12.7472	24.4135
2020-06-05 07:12:00	2020-06-04 21:12:00	1634	12.7498	24.9536
2020-06-05 07:18:00	2020-06-04 21:18:00	1635	12.7522	24.7462
2020-06-05 07:24:00	2020-06-04 21:24:00	1636	12.7495	24.7638
2020-06-05 07:30:00	2020-06-04 21:30:00	1637	12.7477	24.5393
2020-06-05 07:36:00	2020-06-04 21:36:00	1638	12.7484	24.0633
2020-06-05 07:42:00	2020-06-04 21:42:00	1639	12.7468	24.6514
2020-06-05 07:48:00	2020-06-04 21:48:00	1640	12.7486	26.9302
2020-06-05 07:54:00	2020-06-04 21:54:00	1641	12.7489	24.8897
2020-06-05 08:00:00	2020-06-04 22:00:00	1642	12.748	25.1311
2020-06-05 08:06:00	2020-06-04 22:06:00	1643	12.7516	28.7263
2020-06-05 08:12:00	2020-06-04 22:12:00	1644	12.7467	26.8517
2020-06-05 08:18:00	2020-06-04 22:18:00	1645	12.7492	27.639
2020-06-05 08:24:00	2020-06-04 22:24:00	1646	12.7489	26.4764
2020-06-05 08:30:00	2020-06-04 22:30:00	1647	12.7472	25.8252
2020-06-05 08:36:00	2020-06-04 22:36:00	1648	12.7498	24.8531
2020-06-05 08:42:00	2020-06-04 22:42:00	1649	12.7475	24.6404
2020-06-05 08:48:00	2020-06-04 22:48:00	1650	12.7479	25.0493
2020-06-05 08:54:00	2020-06-04 22:54:00	1651	12.7462	25.3673
2020-06-05 09:00:00	2020-06-04 23:00:00	1652	12.7436	24.5501
2020-06-05 09:06:00	2020-06-04 23:06:00	1653	12.7451	25.4917
2020-06-05 09:12:00	2020-06-04 23:12:00	1654	12.7445	24.7408
2020-06-05 09:18:00	2020-06-04 23:18:00	1655	12.7438	24.7692
2020-06-05 09:24:00	2020-06-04 23:24:00	1656	12.7455	24.5458
2020-06-05 09:30:00	2020-06-04 23:30:00	1657	12.7459	26.0598
2020-06-05 09:36:00	2020-06-04 23:36:00	1658	12.7444	24.2346
2020-06-05 09:42:00	2020-06-04 23:42:00	1659	12.745	24.9675
2020-06-05 09:48:00	2020-06-04 23:48:00	1660	12.7469	NAN
2020-06-05 09:54:00	2020-06-04 23:54:00	1661	12.7438	29.3822
2020-06-05 10:00:00	2020-06-05	1662	12.7432	25.1496
2020-06-05 10:06:00	2020-06-05 00:06:00	1663	12.7453	24.1895
2020-06-05 10:12:00	2020-06-05 00:12:00	1664	12.7446	24.6813
2020-06-05 10:18:00	2020-06-05 00:18:00	1665	12.7502	24.9485
2020-06-05 10:24:00	2020-06-05 00:24:00	1666	12.7474	24.0279
2020-06-05 10:30:00	2020-06-05 00:30:00	1667	12.7501	23.963
2020-06-05 10:36:00	2020-06-05 00:36:00	1668	12.7527	24.2717
2020-06-05 10:42:00	2020-06-05 00:42:00	1669	12.7537	23.7528
2020-06-05 10:48:00	2020-06-05 00:48:00	1670	12.7529	24.6266
2020-06-05 10:54:00	2020-06-05 00:54:00	1671	12.7537	27.6321
2020-06-05 11:00:00	2020-06-05 01:00:00	1672	12.7545	23.4326
2020-06-05 11:06:00	2020-06-05 01:06:00	1673	12.7537	23.9066
2020-06-05 11:12:00	2020-06-05 01:12:00	1674	12.7584	24.2611
2020-06-05 11:18:00	2020-06-05 01:18:00	1675	12.761	24.8606
2020-06-05 11:24:00	2020-06-05 01:24:00	1676	12.7602	23.6325
2020-06-05 11:30:00	2020-06-05 01:30:00	1677	12.7603	23.6506
2020-06-05 11:36:00	2020-06-05 01:36:00	1678	12.7578	28.162
2020-06-05 11:42:00	2020-06-05 01:42:00	1679	12.7617	23.8407
2020-06-05 11:48:00	2020-06-05 01:48:00	1680	12.7644	23.6195
2020-06-05 11:54:00	2020-06-05 01:54:00	1681	12.7625	24.5623
2020-06-05 12:00:00	2020-06-05 02:00:00	1682	12.7675	24.163
2020-06-05 12:06:00	2020-06-05 02:06:00	1683	12.766	24.6329
2020-06-05 12:12:00	2020-06-05 02:12:00	1684	12.7686	24.0128
2020-06-05 12:18:00	2020-06-05 02:18:00	1685	12.7715	23.6874
2020-06-05 12:24:00	2020-06-05 02:24:00	1686	12.7686	22.9943
2020-06-05 12:30:00	2020-06-05 02:30:00	1687	12.7706	24.0295
2020-06-05 12:36:00	2020-06-05 02:36:00	1688	12.7704	23.7131
2020-06-05 12:42:00	2020-06-05 02:42:00	1689	12.7732	23.7654
2020-06-05 12:48:00	2020-06-05 02:48:00	1690	12.7763	23.4843
2020-06-05 12:54:00	2020-06-05 02:54:00	1691	12.7734	23.1307
2020-06-05 13:00:00	2020-06-05 03:00:00	1692	12.776	23.2165
2020-06-05 13:06:00	2020-06-05 03:06:00	1693	12.7749	23.0116
2020-06-05 13:12:00	2020-06-05 03:12:00	1694	12.7788	23.873
2020-06-05 13:18:00	2020-06-05 03:18:00	1695	12.7777	22.8624
2020-06-05 13:24:00	2020-06-05 03:24:00	1696	12.7795	NAN
2020-06-05 13:30:00	2020-06-05 03:30:00	1697	12.7812	NAN
2020-06-05 13:36:00	2020-06-05 03:36:00	1698	12.7803	44.649
2020-06-05 13:42:00	2020-06-05 03:42:00	1699	12.7807	24.3626
2020-06-05 13:48:00	2020-06-05 03:48:00	1700	12.7815	23.8276
2020-06-05 13:54:00	2020-06-05 03:54:00	1701	12.7821	27.3549
2020-06-05 14:00:00	2020-06-05 04:00:00	1702	12.7826	23.2589
2020-06-05 14:06:00	2020-06-05 04:06:00	1703	12.7837	23.5423
2020-06-05 14:12:00	2020-06-05 04:12:00	1704	12.7838	23.2029
2020-06-05 14:18:00	2020-06-05 04:18:00	1705	12.7835	22.9493
2020-06-05 14:24:00	2020-06-05 04:24:00	1706	12.7851	22.6435
2020-06-05 14:30:00	2020-06-05 04:30:00	1707	12.7835	23.3022
2020-06-05 14:36:00	2020-06-05 04:36:00	1708	12.7854	23.719
2020-06-05 14:42:00	2020-06-05 04:42:00	1709	12.787	23.4139
2020-06-05 14:48:00	2020-06-05 04:48:00	1710	12.7884	24.3252
2020-06-05 14:54:00	2020-06-05 04:54:00	1711	12.787	24.0678
2020-06-05 15:00:00	2020-06-05 05:00:00	1712	12.7865	24.6893
2020-06-05 15:06:00	2020-06-05 05:06:00	1713	12.786	22.9141
2020-06-05 15:12:00	2020-06-05 05:12:00	1714	12.7871	24.2833
2020-06-05 15:18:00	2020-06-05 05:18:00	1715	12.7856	22.9878
2020-06-05 15:24:00	2020-06-05 05:24:00	1716	12.7889	24.4807
2020-06-05 15:30:00	2020-06-05 05:30:00	1717	12.7885	24.0784
2020-06-05 15:36:00	2020-06-05 05:36:00	1718	12.7924	23.8822
2020-06-05 15:42:00	2020-06-05 05:42:00	1719	12.7913	24.1738
2020-06-05 15:48:00	2020-06-05 05:48:00	1720	12.7898	24.4607
2020-06-05 15:54:00	2020-06-05 05:54:00	1721	12.7882	23.2896
2020-06-05 16:00:00	2020-06-05 06:00:00	1722	12.7872	24.4428
2020-06-05 16:06:00	2020-06-05 06:06:00	1723	12.7901	23.4451
2020-06-05 16:12:00	2020-06-05 06:12:00	1724	12.7907	23.6781
2020-06-05 16:18:00	2020-06-05 06:18:00	1725	12.7912	23.499
2020-06-05 16:24:00	2020-06-05 06:24:00	1726	12.7914	23.6266
2020-06-05 16:30:00	2020-06-05 06:30:00	1727	12.7928	23.9086
2020-06-05 16:36:00	2020-06-05 06:36:00	1728	12.7931	24.0708
2020-06-05 16:42:00	2020-06-05 06:42:00	1729	12.7907	23.5678
2020-06-05 16:48:00	2020-06-05 06:48:00	1730	12.7908	23.2163
2020-06-05 16:54:00	2020-06-05 06:54:00	1731	12.7935	23.6826
2020-06-05 17:00:00	2020-06-05 07:00:00	1732	12.7921	24.3372
2020-06-05 17:06:00	2020-06-05 07:06:00	1733	12.7944	23.1205
2020-06-05 17:12:00	2020-06-05 07:12:00	1734	12.796	22.7507
2020-06-05 17:18:00	2020-06-05 07:18:00	1735	12.7957	23.2886
2020-06-05 17:24:00	2020-06-05 07:24:00	1736	12.7974	22.9054
2020-06-05 17:30:00	2020-06-05 07:30:00	1737	12.7963	22.6469
2020-06-05 17:36:00	2020-06-05 07:36:00	1738	12.7968	23.1667
2020-06-05 17:42:00	2020-06-05 07:42:00	1739	12.7961	23.4412
2020-06-05 17:48:00	2020-06-05 07:48:00	1740	12.7966	23.3191
2020-06-05 17:54:00	2020-06-05 07:54:00	1741	12.7938	23.6132
2020-06-05 18:00:00	2020-06-05 08:00:00	1742	12.7962	26.5806
2020-06-05 18:06:00	2020-06-05 08:06:00	1743	12.797	22.512
2020-06-05 18:12:00	2020-06-05 08:12:00	1744	12.7959	23.0405
2020-06-05 18:18:00	2020-06-05 08:18:00	1745	12.794	22.9369
2020-06-05 18:24:00	2020-06-05 08:24:00	1746	12.7949	23.5828
2020-06-05 18:30:00	2020-06-05 08:30:00	1747	12.7928	23.1211
2020-06-05 18:36:00	2020-06-05 08:36:00	1748	12.7935	30.8677
2020-06-05 18:42:00	2020-06-05 08:42:00	1749	12.7922	22.9184
2020-06-05 18:48:00	2020-06-05 08:48:00	1750	12.7903	22.7682
2020-06-05 18:54:00	2020-06-05 08:54:00	1751	12.7919	23.1638
2020-06-05 19:00:00	2020-06-05 09:00:00	1752	12.791	23.103
2020-06-05 19:06:00	2020-06-05 09:06:00	1753	12.789	23.0273
2020-06-05 19:12:00	2020-06-05 09:12:00	1754	12.7897	21.8565
2020-06-05 19:18:00	2020-06-05 09:18:00	1755	12.7894	22.7078
2020-06-05 19:24:00	2020-06-05 09:24:00	1756	12.7872	22.9119
2020-06-05 19:30:00	2020-06-05 09:30:00	1757	12.7895	23.5037
2020-06-05 19:36:00	2020-06-05 09:36:00	1758	12.787	22.8486
2020-06-05 19:42:00	2020-06-05 09:42:00	1759	12.7848	22.1227
2020-06-05 19:48:00	2020-06-05 09:48:00	1760	12.7865	23.1974
2020-06-05 19:54:00	2020-06-05 09:54:00	1761	12.7853	22.5069
2020-06-05 20:00:00	2020-06-05 10:00:00	1762	12.7861	21.7855
2020-06-05 20:06:00	2020-06-05 10:06:00	1763	12.7853	21.5723
2020-06-05 20:12:00	2020-06-05 10:12:00	1764	12.7849	22.6473
2020-06-05 20:18:00	2020-06-05 10:18:00	1765	12.7836	22.661
2020-06-05 20:24:00	2020-06-05 10:24:00	1766	12.7835	22.3283
2020-06-05 20:30:00	2020-06-05 10:30:00	1767	12.7833	22.7953
2020-06-05 20:36:00	2020-06-05 10:36:00	1768	12.7817	34.3971
2020-06-05 20:42:00	2020-06-05 10:42:00	1769	12.7794	22.0084
2020-06-05 20:48:00	2020-06-05 10:48:00	1770	12.7803	23.0313
2020-06-05 20:54:00	2020-06-05 10:54:00	1771	12.7812	23.0373
2020-06-05 21:00:00	2020-06-05 11:00:00	1772	12.7804	22.1738
2020-06-05 21:06:00	2020-06-05 11:06:00	1773	12.7758	23.0039
2020-06-05 21:12:00	2020-06-05 11:12:00	1774	12.7783	22.1215
2020-06-05 21:18:00	2020-06-05 11:18:00	1775	12.7799	22.9703
2020-06-05 21:24:00	2020-06-05 11:24:00	1776	12.7775	22.5147
2020-06-05 21:30:00	2020-06-05 11:30:00	1777	12.7764	21.9426
2020-06-05 21:36:00	2020-06-05 11:36:00	1778	12.7768	22.3079
2020-06-05 21:42:00	2020-06-05 11:42:00	1779	12.7752	22.3783
2020-06-05 21:48:00	2020-06-05 11:48:00	1780	12.7758	22.548
2020-06-05 21:54:00	2020-06-05 11:54:00	1781	12.7749	21.8716
2020-06-05 22:00:00	2020-06-05 12:00:00	1782	12.773	22.0529
2020-06-05 22:06:00	2020-06-05 12:06:00	1783	12.7753	24.9471
2020-06-05 22:12:00	2020-06-05 12:12:00	1784	12.7747	21.2699
2020-06-05 22:18:00	2020-06-05 12:18:00	1785	12.7734	22.1445
2020-06-05 22:24:00	2020-06-05 12:24:00	1786	12.7725	21.8511
2020-06-05 22:30:00	2020-06-05 12:30:00	1787	12.7748	21.6292
2020-06-05 22:36:00	2020-06-05 12:36:00	1788	12.7746	22.5731
2020-06-05 22:42:00	2020-06-05 12:42:00	1789	12.7742	21.2882
2020-06-05 22:48:00	2020-06-05 12:48:00	1790	12.7721	22.359
2020-06-05 22:54:00	2020-06-05 12:54:00	1791	12.774	22.0737
2020-06-05 23:00:00	2020-06-05 13:00:00	1792	12.7725	22.1406
2020-06-05 23:06:00	2020-06-05 13:06:00	1793	12.7731	21.4892
2020-06-05 23:12:00	2020-06-05 13:12:00	1794	12.7759	22.1032
2020-06-05 23:18:00	2020-06-05 13:18:00	1795	12.7725	21.651
2020-06-05 23:24:00	2020-06-05 13:24:00	1796	12.7712	21.7603
2020-06-05 23:30:00	2020-06-05 13:30:00	1797	12.7705	21.9577
2020-06-05 23:36:00	2020-06-05 13:36:00	1798	12.7714	21.4276
2020-06-05 23:42:00	2020-06-05 13:42:00	1799	12.7745	21.5584
2020-06-05 23:48:00	2020-06-05 13:48:00	1800	12.773	21.7292
2020-06-05 23:54:00	2020-06-05 13:54:00	1801	12.7717	21.1455
2020-06-06	2020-06-05 14:00:00	1802	12.772	22.3211
2020-06-06 00:06:00	2020-06-05 14:06:00	1803	12.7711	20.7078
2020-06-06 00:12:00	2020-06-05 14:12:00	1804	12.77	21.5631
2020-06-06 00:18:00	2020-06-05 14:18:00	1805	12.7689	21.3085
2020-06-06 00:24:00	2020-06-05 14:24:00	1806	12.7691	21.2173
2020-06-06 00:30:00	2020-06-05 14:30:00	1807	12.7697	21.3427
2020-06-06 00:36:00	2020-06-05 14:36:00	1808	12.7705	21.6925
2020-06-06 00:42:00	2020-06-05 14:42:00	1809	12.7678	20.8757
2020-06-06 00:48:00	2020-06-05 14:48:00	1810	12.7713	21.4117
2020-06-06 00:54:00	2020-06-05 14:54:00	1811	12.7705	20.5191
2020-06-06 01:00:00	2020-06-05 15:00:00	1812	12.7704	21.1577
2020-06-06 01:06:00	2020-06-05 15:06:00	1813	12.7691	20.4335
2020-06-06 01:12:00	2020-06-05 15:12:00	1814	12.7714	20.1465
2020-06-06 01:18:00	2020-06-05 15:18:00	1815	12.7711	21.5263
2020-06-06 01:24:00	2020-06-05 15:24:00	1816	12.7704	21.4856
2020-06-06 01:30:00	2020-06-05 15:30:00	1817	12.7707	21.6091
2020-06-06 01:36:00	2020-06-05 15:36:00	1818	12.7709	21.2847
2020-06-06 01:42:00	2020-06-05 15:42:00	1819	12.7703	22.1117
2020-06-06 01:48:00	2020-06-05 15:48:00	1820	12.7691	21.3266
2020-06-06 01:54:00	2020-06-05 15:54:00	1821	12.7686	21.3236
2020-06-06 02:00:00	2020-06-05 16:00:00	1822	12.77	21.4353
2020-06-06 02:06:00	2020-06-05 16:06:00	1823	12.7695	22.0513
2020-06-06 02:12:00	2020-06-05 16:12:00	1824	12.7676	20.9388
2020-06-06 02:18:00	2020-06-05 16:18:00	1825	12.7706	21.7377
2020-06-06 02:24:00	2020-06-05 16:24:00	1826	12.77	21.1101
2020-06-06 02:30:00	2020-06-05 16:30:00	1827	12.7697	21.0883
2020-06-06 02:36:00	2020-06-05 16:36:00	1828	12.7688	21.0834
2020-06-06 02:42:00	2020-06-05 16:42:00	1829	12.7672	21.1309
2020-06-06 02:48:00	2020-06-05 16:48:00	1830	12.7686	20.9068
2020-06-06 02:54:00	2020-06-05 16:54:00	1831	12.7702	20.5545
2020-06-06 03:00:00	2020-06-05 17:00:00	1832	12.7686	21.5759
2020-06-06 03:06:00	2020-06-05 17:06:00	1833	12.7702	20.8352
2020-06-06 03:12:00	2020-06-05 17:12:00	1834	12.7656	20.4485
2020-06-06 03:18:00	2020-06-05 17:18:00	1835	12.7673	21.6716
2020-06-06 03:24:00	2020-06-05 17:24:00	1836	12.7682	20.5643
2020-06-06 03:30:00	2020-06-05 17:30:00	1837	12.7663	20.5132
2020-06-06 03:36:00	2020-06-05 17:36:00	1838	12.7682	20.2296
2020-06-06 03:42:00	2020-06-05 17:42:00	1839	12.7689	21.078
2020-06-06 03:48:00	2020-06-05 17:48:00	1840	12.7693	20.2007
2020-06-06 03:54:00	2020-06-05 17:54:00	1841	12.7695	20.4717
2020-06-06 04:00:00	2020-06-05 18:00:00	1842	12.7676	20.6559
2020-06-06 04:06:00	2020-06-05 18:06:00	1843	12.7668	20.5462
2020-06-06 04:12:00	2020-06-05 18:12:00	1844	12.7676	20.8091
2020-06-06 04:18:00	2020-06-05 18:18:00	1845	12.7696	20.1311
2020-06-06 04:24:00	2020-06-05 18:24:00	1846	12.7685	20.3445
2020-06-06 04:30:00	2020-06-05 18:30:00	1847	12.7681	20.5112
2020-06-06 04:36:00	2020-06-05 18:36:00	1848	12.7687	20.3742
2020-06-06 04:42:00	2020-06-05 18:42:00	1849	12.765	20.4931
2020-06-06 04:48:00	2020-06-05 18:48:00	1850	12.7689	20.8578
2020-06-06 04:54:00	2020-06-05 18:54:00	1851	12.7673	20.9009
2020-06-06 05:00:00	2020-06-05 19:00:00	1852	12.7673	20.4811
2020-06-06 05:06:00	2020-06-05 19:06:00	1853	12.7684	20.6653
2020-06-06 05:12:00	2020-06-05 19:12:00	1854	12.7687	20.7312
2020-06-06 05:18:00	2020-06-05 19:18:00	1855	12.7681	20.0629
2020-06-06 05:24:00	2020-06-05 19:24:00	1856	12.7706	20.1781
2020-06-06 05:30:00	2020-06-05 19:30:00	1857	12.7688	35.9803
2020-06-06 05:36:00	2020-06-05 19:36:00	1858	12.7673	19.8915
2020-06-06 05:42:00	2020-06-05 19:42:00	1859	12.7658	20.0118
2020-06-06 05:48:00	2020-06-05 19:48:00	1860	12.7679	20.9361
2020-06-06 05:54:00	2020-06-05 19:54:00	1861	12.7682	20.6952
2020-06-06 06:00:00	2020-06-05 20:00:00	1862	12.7702	20.8417
2020-06-06 06:06:00	2020-06-05 20:06:00	1863	12.7697	20.5452
2020-06-06 06:12:00	2020-06-05 20:12:00	1864	12.7665	20.883
2020-06-06 06:18:00	2020-06-05 20:18:00	1865	12.7675	20.9467
2020-06-06 06:24:00	2020-06-05 20:24:00	1866	12.7693	20.6408
2020-06-06 06:30:00	2020-06-05 20:30:00	1867	12.7672	20.9097
2020-06-06 06:36:00	2020-06-05 20:36:00	1868	12.7651	20.5539
2020-06-06 06:42:00	2020-06-05 20:42:00	1869	12.7684	20.8728
2020-06-06 06:48:00	2020-06-05 20:48:00	1870	12.7679	21.3985
2020-06-06 06:54:00	2020-06-05 20:54:00	1871	12.7694	20.9335
2020-06-06 07:00:00	2020-06-05 21:00:00	1872	12.7666	19.7595
2020-06-06 07:06:00	2020-06-05 21:06:00	1873	12.7684	21.7422
2020-06-06 07:12:00	2020-06-05 21:12:00	1874	12.7696	20.5692
2020-06-06 07:18:00	2020-06-05 21:18:00	1875	12.7672	19.9858
2020-06-06 07:24:00	2020-06-05 21:24:00	1876	12.7685	20.4727
2020-06-06 07:30:00	2020-06-05 21:30:00	1877	12.7653	21.1705
2020-06-06 07:36:00	2020-06-05 21:36:00	1878	12.7663	20.66
2020-06-06 07:42:00	2020-06-05 21:42:00	1879	12.7682	20.7615
2020-06-06 07:48:00	2020-06-05 21:48:00	1880	12.7682	22.361
2020-06-06 07:54:00	2020-06-05 21:54:00	1881	12.7669	21.4648
2020-06-06 08:00:00	2020-06-05 22:00:00	1882	12.7676	20.4927
2020-06-06 08:06:00	2020-06-05 22:06:00	1883	12.766	20.0771
2020-06-06 08:12:00	2020-06-05 22:12:00	1884	12.7689	20.729
2020-06-06 08:18:00	2020-06-05 22:18:00	1885	12.767	23.0796
2020-06-06 08:24:00	2020-06-05 22:24:00	1886	12.7678	22.6832
2020-06-06 08:30:00	2020-06-05 22:30:00	1887	12.7687	22.1416
2020-06-06 08:36:00	2020-06-05 22:36:00	1888	12.7665	22.8042
2020-06-06 08:42:00	2020-06-05 22:42:00	1889	12.7666	59.3572
2020-06-06 08:48:00	2020-06-05 22:48:00	1890	12.7666	22.6127
2020-06-06 08:54:00	2020-06-05 22:54:00	1891	12.7658	21.5456
2020-06-06 09:00:00	2020-06-05 23:00:00	1892	12.7663	21.5486
2020-06-06 09:06:00	2020-06-05 23:06:00	1893	12.766	21.2405
2020-06-06 09:12:00	2020-06-05 23:12:00	1894	12.7672	21.1592
2020-06-06 09:18:00	2020-06-05 23:18:00	1895	12.768	21.4202
2020-06-06 09:24:00	2020-06-05 23:24:00	1896	12.7647	21.4056
2020-06-06 09:30:00	2020-06-05 23:30:00	1897	12.7656	21.362
2020-06-06 09:36:00	2020-06-05 23:36:00	1898	12.7661	21.101
2020-06-06 09:42:00	2020-06-05 23:42:00	1899	12.7647	21.4532
2020-06-06 09:48:00	2020-06-05 23:48:00	1900	12.7668	21.009
2020-06-06 09:54:00	2020-06-05 23:54:00	1901	12.7644	20.5778
2020-06-06 10:00:00	2020-06-06	1902	12.7646	19.916
2020-06-06 10:06:00	2020-06-06 00:06:00	1903	12.7647	20.9473
2020-06-06 10:12:00	2020-06-06 00:12:00	1904	12.7671	19.9976
2020-06-06 10:18:00	2020-06-06 00:18:00	1905	12.7675	20.5222
2020-06-06 10:24:00	2020-06-06 00:24:00	1906	12.7669	20.1644
2020-06-06 10:30:00	2020-06-06 00:30:00	1907	12.7676	20.4656
2020-06-06 10:36:00	2020-06-06 00:36:00	1908	12.7663	20.069
2020-06-06 10:42:00	2020-06-06 00:42:00	1909	12.7663	20.1671
2020-06-06 10:48:00	2020-06-06 00:48:00	1910	12.7656	19.93
2020-06-06 10:54:00	2020-06-06 00:54:00	1911	12.7682	21.6345
2020-06-06 11:00:00	2020-06-06 01:00:00	1912	12.7658	20.0588
2020-06-06 11:06:00	2020-06-06 01:06:00	1913	12.7689	21.0543
2020-06-06 11:12:00	2020-06-06 01:12:00	1914	12.7668	22.2027
2020-06-06 11:18:00	2020-06-06 01:18:00	1915	12.7679	20.6073
2020-06-06 11:24:00	2020-06-06 01:24:00	1916	12.7679	20.9799
2020-06-06 11:30:00	2020-06-06 01:30:00	1917	12.7691	35.2768
2020-06-06 11:36:00	2020-06-06 01:36:00	1918	12.7674	23.5733
2020-06-06 11:42:00	2020-06-06 01:42:00	1919	12.7694	19.6872
2020-06-06 11:48:00	2020-06-06 01:48:00	1920	12.7693	19.8795
2020-06-06 11:54:00	2020-06-06 01:54:00	1921	12.7719	21.5552
2020-06-06 12:00:00	2020-06-06 02:00:00	1922	12.7701	20.5965
2020-06-06 12:06:00	2020-06-06 02:06:00	1923	12.7702	21.5309
2020-06-06 12:12:00	2020-06-06 02:12:00	1924	12.77	20.1626
2020-06-06 12:18:00	2020-06-06 02:18:00	1925	12.77	20.6567
2020-06-06 12:24:00	2020-06-06 02:24:00	1926	12.7703	20.5364
2020-06-06 12:30:00	2020-06-06 02:30:00	1927	12.77	48.9758
2020-06-06 12:36:00	2020-06-06 02:36:00	1928	12.769	21.7243
2020-06-06 12:42:00	2020-06-06 02:42:00	1929	12.7704	20.6944
2020-06-06 12:48:00	2020-06-06 02:48:00	1930	12.7733	20.6028
2020-06-06 12:54:00	2020-06-06 02:54:00	1931	12.7736	21.0301
2020-06-06 13:00:00	2020-06-06 03:00:00	1932	12.7698	21.3427
2020-06-06 13:06:00	2020-06-06 03:06:00	1933	12.7716	20.6669
2020-06-06 13:12:00	2020-06-06 03:12:00	1934	12.7723	20.6278
2020-06-06 13:18:00	2020-06-06 03:18:00	1935	12.7717	21.2562
2020-06-06 13:24:00	2020-06-06 03:24:00	1936	12.7726	21.3063
2020-06-06 13:30:00	2020-06-06 03:30:00	1937	12.775	22.4984
2020-06-06 13:36:00	2020-06-06 03:36:00	1938	12.7726	20.6844
2020-06-06 13:42:00	2020-06-06 03:42:00	1939	12.7742	20.5145
2020-06-06 13:48:00	2020-06-06 03:48:00	1940	12.7733	21.4115
2020-06-06 13:54:00	2020-06-06 03:54:00	1941	12.7756	20.2538
2020-06-06 14:00:00	2020-06-06 04:00:00	1942	12.7747	22.1622
2020-06-06 14:06:00	2020-06-06 04:06:00	1943	12.7734	19.9286
2020-06-06 14:12:00	2020-06-06 04:12:00	1944	12.7747	21.2267
2020-06-06 14:18:00	2020-06-06 04:18:00	1945	12.7737	22.1677
2020-06-06 14:24:00	2020-06-06 04:24:00	1946	12.7747	22.4597
2020-06-06 14:30:00	2020-06-06 04:30:00	1947	12.7759	19.2475
2020-06-06 14:36:00	2020-06-06 04:36:00	1948	12.7766	23.559
2020-06-06 14:42:00	2020-06-06 04:42:00	1949	12.7758	20.1769
2020-06-06 14:48:00	2020-06-06 04:48:00	1950	12.7756	19.837
2020-06-06 14:54:00	2020-06-06 04:54:00	1951	12.7799	19.5071
2020-06-06 15:00:00	2020-06-06 05:00:00	1952	12.7749	19.617
2020-06-06 15:06:00	2020-06-06 05:06:00	1953	12.777	20.2666
2020-06-06 15:12:00	2020-06-06 05:12:00	1954	12.7793	21.0006
2020-06-06 15:18:00	2020-06-06 05:18:00	1955	12.779	20.8238
2020-06-06 15:24:00	2020-06-06 05:24:00	1956	12.7771	23.2735
2020-06-06 15:30:00	2020-06-06 05:30:00	1957	12.7779	24.3761
2020-06-06 15:36:00	2020-06-06 05:36:00	1958	12.7784	28.9947
2020-06-06 15:42:00	2020-06-06 05:42:00	1959	12.7796	19.6887
2020-06-06 15:48:00	2020-06-06 05:48:00	1960	12.7803	20.501
2020-06-06 15:54:00	2020-06-06 05:54:00	1961	12.7806	19.4443
2020-06-06 16:00:00	2020-06-06 06:00:00	1962	12.7806	20.0214
2020-06-06 16:06:00	2020-06-06 06:06:00	1963	12.7806	22.6197
2020-06-06 16:12:00	2020-06-06 06:12:00	1964	12.7806	19.4904
2020-06-06 16:18:00	2020-06-06 06:18:00	1965	12.7811	20.5417
2020-06-06 16:24:00	2020-06-06 06:24:00	1966	12.7802	19.7469
2020-06-06 16:30:00	2020-06-06 06:30:00	1967	12.7818	24.1673
2020-06-06 16:36:00	2020-06-06 06:36:00	1968	12.7814	20.2338
2020-06-06 16:42:00	2020-06-06 06:42:00	1969	12.7811	21.9837
2020-06-06 16:48:00	2020-06-06 06:48:00	1970	12.7828	24.4388
2020-06-06 16:54:00	2020-06-06 06:54:00	1971	12.7825	20.3321
2020-06-06 17:00:00	2020-06-06 07:00:00	1972	12.7789	24.6427
2020-06-06 17:06:00	2020-06-06 07:06:00	1973	12.7807	25.2456
2020-06-06 17:12:00	2020-06-06 07:12:00	1974	12.7821	19.9032
2020-06-06 17:18:00	2020-06-06 07:18:00	1975	12.78	20.2955
2020-06-06 17:24:00	2020-06-06 07:24:00	1976	12.7805	31.7412
2020-06-06 17:30:00	2020-06-06 07:30:00	1977	12.7818	37.7737
2020-06-06 17:36:00	2020-06-06 07:36:00	1978	12.7798	19.3822
2020-06-06 17:42:00	2020-06-06 07:42:00	1979	12.7801	26.0993
2020-06-06 17:48:00	2020-06-06 07:48:00	1980	12.7771	25.4304
2020-06-06 17:54:00	2020-06-06 07:54:00	1981	12.7793	31.7145
2020-06-06 18:00:00	2020-06-06 08:00:00	1982	12.7804	30.138
2020-06-06 18:06:00	2020-06-06 08:06:00	1983	12.7789	26.2619
2020-06-06 18:12:00	2020-06-06 08:12:00	1984	12.7805	22.2485
2020-06-06 18:18:00	2020-06-06 08:18:00	1985	12.7776	20.52
2020-06-06 18:24:00	2020-06-06 08:24:00	1986	12.7792	23.51
2020-06-06 18:30:00	2020-06-06 08:30:00	1987	12.778	20.8698
2020-06-06 18:36:00	2020-06-06 08:36:00	1988	12.7749	19.6791
2020-06-06 18:42:00	2020-06-06 08:42:00	1989	12.7789	21.9925
2020-06-06 18:48:00	2020-06-06 08:48:00	1990	12.7776	25.1486
2020-06-06 18:54:00	2020-06-06 08:54:00	1991	12.7777	22.2579
2020-06-06 19:00:00	2020-06-06 09:00:00	1992	12.7763	23.0904
2020-06-06 19:06:00	2020-06-06 09:06:00	1993	12.7774	19.383
2020-06-06 19:12:00	2020-06-06 09:12:00	1994	12.7737	25.3979
2020-06-06 19:18:00	2020-06-06 09:18:00	1995	12.7764	25.5959
2020-06-06 19:24:00	2020-06-06 09:24:00	1996	12.776	28.404
2020-06-06 19:30:00	2020-06-06 09:30:00	1997	12.7735	24.2094
2020-06-06 19:36:00	2020-06-06 09:36:00	1998	12.7764	41.197
[truncated: 62,038 more rows]
